# Supplementary material for: meso-Alkylidenyl dibenzihexaphyrins: synthesis and protonation studies
Source: Royal Society of Chemistry journal article supplement (doi:10.1039/c9cc04607k), 2019-01-01
Supplement: c9cc04607k1.pdf [file c9cc04607k1.pdf]

## Electronic Supplementary Information

### *meso*-Alkylidenyl dibenzihexaphyrins: Synthesis and protonation studies

Seong-Jin Hong, Ranjan Dutta, Ravi Kumar, Qing He, Vincent M. Lynch, Jonathan L. Sessler  
and Chang-Hee Lee

#### Table of Contents

|                                                                                            |          |
|--------------------------------------------------------------------------------------------|----------|
| Synthetic Experimental                                                                     | S2 – S4  |
| Spectroscopic data for compound <b>3-7</b>                                                 | S5 - S13 |
| <sup>1</sup> H NMR titration data for compound <b>5</b> , <b>6</b> , and <b>7</b> with TFA | S13-S18  |
| UV-vis titration data for compound <b>5</b> and <b>6</b> with TFA and TBAF                 | S18-S22  |
| Possible tautomeric forms of compound <b>5</b> and <b>6</b>                                | S23      |
| Crystallographic data                                                                      | S24-S28  |
| References                                                                                 | S28      |

**General Procedure:**  $^1\text{H}$  and  $^{13}\text{C}$  NMR spectra (JNM-ECZ400S/L1 400 MHz and Bruker Avance II 600 MHz) were recorded using TMS as the internal standard. High resolution mass spectra were obtained on a Voyager-DE STR MALDI-TOF mass spectrometer and a JEOL JMS-700 GC mass spectrometer. UV-visible spectral studies were performed using Varian Cary 100 Conc spectrophotometer. Column chromatography was performed over silica gel (Merck, 230-400 mesh). Pyrrole was distilled at atmospheric pressure from  $\text{CaH}_2$ . All other reagents were obtained from Aldrich and used as received unless noted otherwise.

### Synthetic Experimental

**Synthesis of compound (3):** To the solution of compound **1**<sup>1</sup> (0.20 g, 0.51 mmol) and pyrrole (5 mL, 72.1 mmol) was added  $\text{InCl}_3$  (0.036 g, 0.16 mmol). The mixture was stirred for 1 h at 40 °C. Then aqueous NaOH solution (0.1 N, 5 mL) and brine (30 mL) were added in order to quench the reaction before the mixture was extracted with  $\text{CH}_2\text{Cl}_2$  (20 mL  $\times$  3). The organic layer was dried ( $\text{Na}_2\text{SO}_4$ ) and the volatiles were removed in *vacuo*. The crude product was recrystallized from MeOH and hexanes to give a brownish solid. Yield: 0.182 g (68%);  $^1\text{H}$  NMR (400 MHz,  $\text{CDCl}_3$ , diastereomers)  $\delta$  3.59 – 3.61 (m, 2H), 4.95 – 4.97 (m, 2H), 5.86 – 5.90 (m, 2H), 6.05 – 6.09 (m, , 2H), 6.73 – 6.76 (m, 2H), 6.76 – 6.86 (m, 3H), 6.95 – 6.96 (m, 1H), 7.70 – 7.73 (m, 3H), 7.73 – 7.86 (m, 4H), 7.91 – 7.93 (m, 1H), 9.71 (br s, 2H);  $^{13}\text{C}$  NMR (100 MHz,  $\text{CDCl}_3$ )  $\delta$  42.4, 42.6, 59.0, 59.0, 106.8, 106.8, 107.9, 117.9, 123.3, 123.4, 123.4, 123.5, 126.6, 126.8, 127.5, 127.6, 128.5, 128.6, 130.9, 131.0, 135.5, 135.9, 136.0, 140.0, 140.0, 142.3, 142.4, 142.5, 198.5, 198.6, 200.9, 200.9; EI MS calcd for  $\text{C}_{34}\text{H}_{24}\text{N}_2\text{O}_4$  524.1736, found 524.1735.

**Synthesis of *m*-dibenzihexaphyrin (5):** Compound **3** (1.01 g, 1.93 mmol) and pentafluorobenzaldehyde (290  $\mu\text{L}$ , 2.35 mmol) were dissolved in  $\text{CH}_2\text{Cl}_2$  (200 mL) with stirring and then TFA (80  $\mu\text{L}$ , 1.04 mmol) was added. The resulting mixture was stirred for 12 h at room temperature. DDQ (1.32 g, 5.81 mmol) and TEA (140  $\mu\text{L}$ , 1.00 mmol) were added and the stirring continued for 1 h. After quenching with brine (100 mL), an organic layer was obtained by extracting with  $\text{CH}_2\text{Cl}_2$  (50 mL  $\times$  4). The combined organic layers were dried over  $\text{Na}_2\text{SO}_4$ , filtered, and concentrated under reduced pressure. The crude product obtained in this way was purified by column chromatography over silica (from  $\text{CH}_2\text{Cl}_2$  to  $\text{CH}_2\text{Cl}_2/\text{EtOAc}$  = 95/5) to give a yellowish

solid. Yield: 79 mg (6%);  $^1\text{H}$  NMR (400 MHz,  $\text{CDCl}_3$ )  $\delta$  6.38 (s, 2H), 6.74 – 6.75 (d,  $J$  = 4.8 Hz, 2H), 6.95 – 6.97 (d,  $J$  = 4.7 Hz, 2H), 7.31 (s, 2H), 7.36 – 7.38 (d,  $J$  = 7.6 Hz, 2H), 7.50 – 7.53 (m, 4H), 7.62 – 7.64 (m, 2H), 7.66 – 7.72 (m, 4H), 7.73 – 7.77 (s, 4H), 7.80 – 7.83 (m, 4H), 7.97 – 8.01 (m, 4H), 14.27 (s, 2H);  $^{13}\text{C}$  NMR (150 MHz, TFA- $d$ )  $\delta$  110.2, 126.0, 126.5, 129.6, 130.5, 131.1, 132.3, 133.0, 133.6, 135.9, 137.0, 137.5, 138.5, 138.9, 139.2, 139.6, 140.1, 140.3, 140.4, 140.4, 142.2, 142.8, 143.3, 143.6, 144.2, 146.9, 148.6, 151.9, 159.2, 191.6, 193.2, 194.9; MALDI-TOF MS calcd for  $\text{C}_{82}\text{H}_{34}\text{F}_{10}\text{N}_4\text{O}_8$  1392.222, found 1393.227.

**Synthesis of compound (4):** To a solution of compound **2**<sup>1-2</sup> (1.51 g, 3.86 mmol) and pyrrole (20 mL, 288.3 mmol) was added  $\text{InCl}_3$  (0.255 g, 1.15 mmol). The resulting mixture was stirred for 1 h at 40 °C. An aqueous solution of NaOH (0.1 N, 5 mL) and brine (50 mL) was then added in order to quench the reaction before the mixture was extracted with  $\text{CH}_2\text{Cl}_2$  (40 mL  $\times$  3). The organic layer was dried ( $\text{Na}_2\text{SO}_4$ ) and the volatiles removed in *vacuo*. The crude product obtained in this way was recrystallized from MeOH and hexanes to give a brownish solid. Yield: 1.43 g (71%);  $^1\text{H}$  NMR (400 MHz,  $\text{CDCl}_3$ , diastereomers)  $\delta$  3.62 – 3.63 (m, 2H), 4.98 – 4.99 (m, 2H), 5.92 – 5.94 (m, 2H), 6.04 – 6.07 (m, 2H), 6.73 – 6.75 (m, 2H), 6.78 (s, 4H), 7.71 – 7.82 (m, 6H), 7.85 – 7.89 (m, 2H), 9.72 (br s, 2H);  $^{13}\text{C}$  NMR (100 MHz,  $\text{CDCl}_3$ )  $\delta$  41.8, 41.9, 59.1, 59.2, 106.8, 107.9, 108.2, 117.9, 123.3, 123.4, 123.4, 128.1, 131.2, 131.2, 135.7, 136.0, 138.4, 142.3, 142.3, 142.4, 142.4, 198.5, 198.6, 200.8, 200.9; EI MS calcd for  $\text{C}_{34}\text{H}_{24}\text{N}_2\text{O}_4$  524.1736, found 524.1737.

**Synthesis of *p*-dibenzihexaphyrin (6):** Compound **4** (1.01 g, 1.93 mmol) and pentafluorobenzaldehyde (285  $\mu\text{L}$ , 2.31 mmol) were dissolved in  $\text{CH}_2\text{Cl}_2$  (200 mL) with stirring. Then, TFA (130  $\mu\text{L}$ , 1.69 mmol) was added. The resulting mixture was stirred for 12 h at room temperature. DDQ (1.30 g, 5.74 mmol) and TEA (240  $\mu\text{L}$ , 1.72 mmol) were added and the stirring continued for an additional 1 h. After quenching with brine (100 mL) an organic phase was obtained by extracting with  $\text{CH}_2\text{Cl}_2$  (50 mL  $\times$  4). The combined organic layers were dried over  $\text{Na}_2\text{SO}_4$ , filtered, and concentrated under reduced pressure. The crude product generated in this manner was purified by column chromatography over silica (from  $\text{CH}_2\text{Cl}_2$  to  $\text{CH}_2\text{Cl}_2/\text{EtOAc}$  = 95/5) to give a yellowish solid. Yield: 195 mg (15%);  $^1\text{H}$  NMR (400 MHz,  $\text{CDCl}_3$ )  $\delta$  6.38 – 6.40 (m, 2H), 6.88 (d,  $J$  = 4.7 Hz, 2H), 7.27 (s, 2H), 7.31 – 7.33 (m, 4H), 7.49 – 7.51 (m, 6H), 7.73 – 7.77 (m, 4H), 7.81 – 7.86 (m, 8H), 8.01 – 8.04 (m, 4H), 14.45 (s, 2H);  $^1\text{H}$  NMR (600 MHz, TFA- $d$ )  $\delta$  6.72 (d,  $J$  = 4.2 Hz, 2H), 7.17 (s, 2H), 7.51 (s, 2H), 7.53 (d,  $J$  = 7.80 Hz, 4H),

7.71 (d,  $J = 8.4$  Hz, 4H), 7.73-7.74 (m, 2H), 7.90 - 7.94 (m, 6H), 7.98 - 8.02 (m, 6H), 8.05 - 8.07 (m, 2H), 8.13 - 8.14 (m, 2H);  $^{13}\text{C}$  NMR (150 MHz, TFA- $d$ )  $\delta$  110.1, 126.3, 126.7, 126.8, 126.8, 130.3, 130.8, 131.9, 132.1, 133.6, 134.6, 136.0, 136.2, 137.1, 138.0, 139.0, 140.0, 140.2, 140.6, 140.7, 140.8, 140.8, 142.1, 142.5, 143.1, 143.2, 143.4, 143.9, 147.2, 148.4, 149.0, 151.4, 160.7, 192.2, 193.1, 193.8, 195.2; MALDI-TOF MS calcd for  $\text{C}_{82}\text{H}_{34}\text{F}_{10}\text{N}_4\text{O}_8$  1392.222, found 1393.259.

**Synthesis of *p*-benzithiaporphyrin (7):** Compound **4** (0.2 g, 0.38 mmol) and 2,5-bis-thiophene-dimethanol (0.14 g, 0.47 mmol) were dissolved in  $\text{CH}_2\text{Cl}_2$  (40 mL) with stirring. Then, TFA (15  $\mu\text{L}$ , 0.19 mmol) was added. The resulting mixture was stirred for 24 h at room temperature. At this point, DDQ (0.26 g, 1.15 mmol) and TEA (27  $\mu\text{L}$ , 0.19 mmol) were added and the stirring continued for an additional 1 h. After quenching with brine (100 mL) and extracting with  $\text{CH}_2\text{Cl}_2$  (50 mL x 3), the combined organic layers were dried over  $\text{Na}_2\text{SO}_4$ , filtered, and concentrated under reduced pressure. The crude product obtained in this way was purified by column chromatography over silica gel (eluent gradient from  $\text{CH}_2\text{Cl}_2$  to  $\text{CH}_2\text{Cl}_2/\text{EtOAc} = 95/5$ ) to give a black solid. Yield: 17 mg (6%);  $^1\text{H}$  NMR (400 MHz,  $\text{CDCl}_3$ )  $\delta$  6.24 – 6.25 (m, 2H), 6.48 (s, 2H), 7.30 – 7.32 (m, 4H), 7.43 – 7.45 (m, 6H), 7.58 (s, 4H), 7.68 – 7.73 (m, 4H), 7.88- 7.89 (m, 2H), 7.93 – 7.95 (m, 2H), 8.50 (br s, 2H), 8.52 – 8.53 (m, 2H);  $^{13}\text{C}$  NMR (150 MHz,  $\text{CDCl}_3$ )  $\delta$  119.7, 121.9, 122.2, 123.0, 124.0, 125.9, 128.5, 128.6, 129.2, 130.7, 133.8, 134.1, 134.3, 134.6, 138.0, 139.2, 139.9, 140.4, 140.9, 141.3, 145.9, 189.8, 189.8; MALDI-TOF MS calcd for  $\text{C}_{52}\text{H}_{30}\text{N}_2\text{O}_4\text{S}$  778.193, found 778.269.

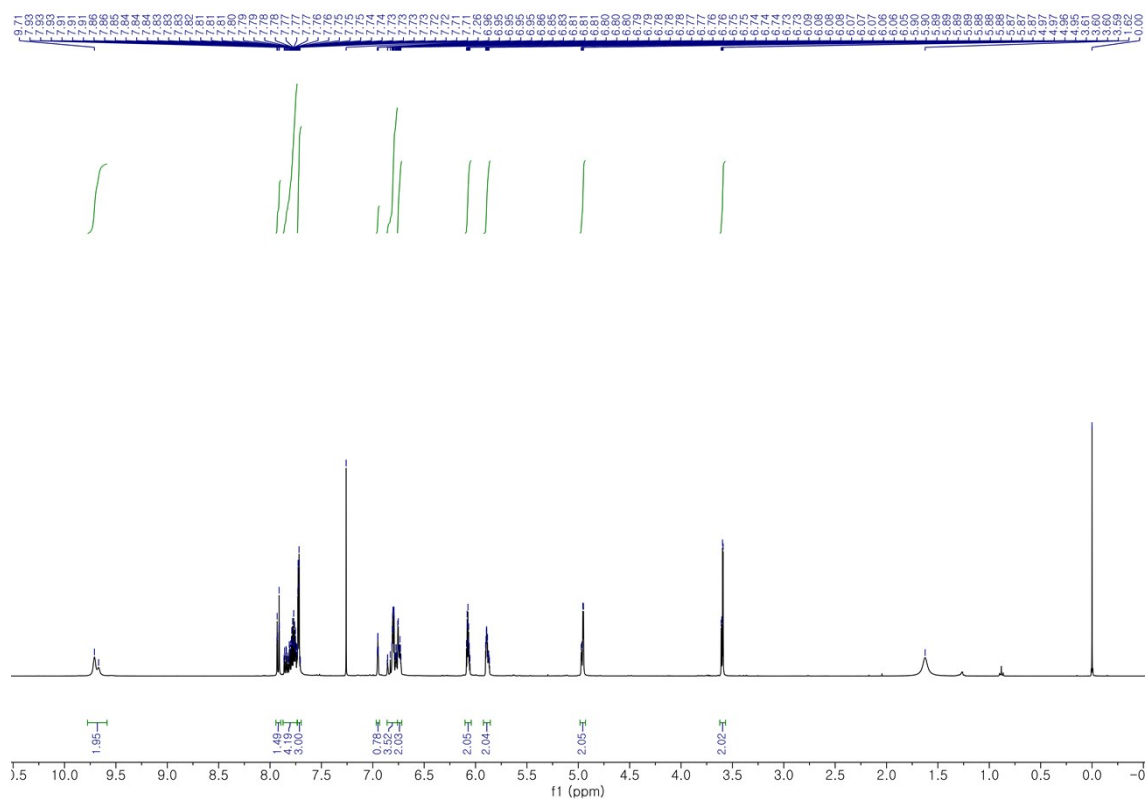

**Figure S1.**  $^1\text{H}$  NMR spectrum of compound **3** in  $\text{CDCl}_3$ .

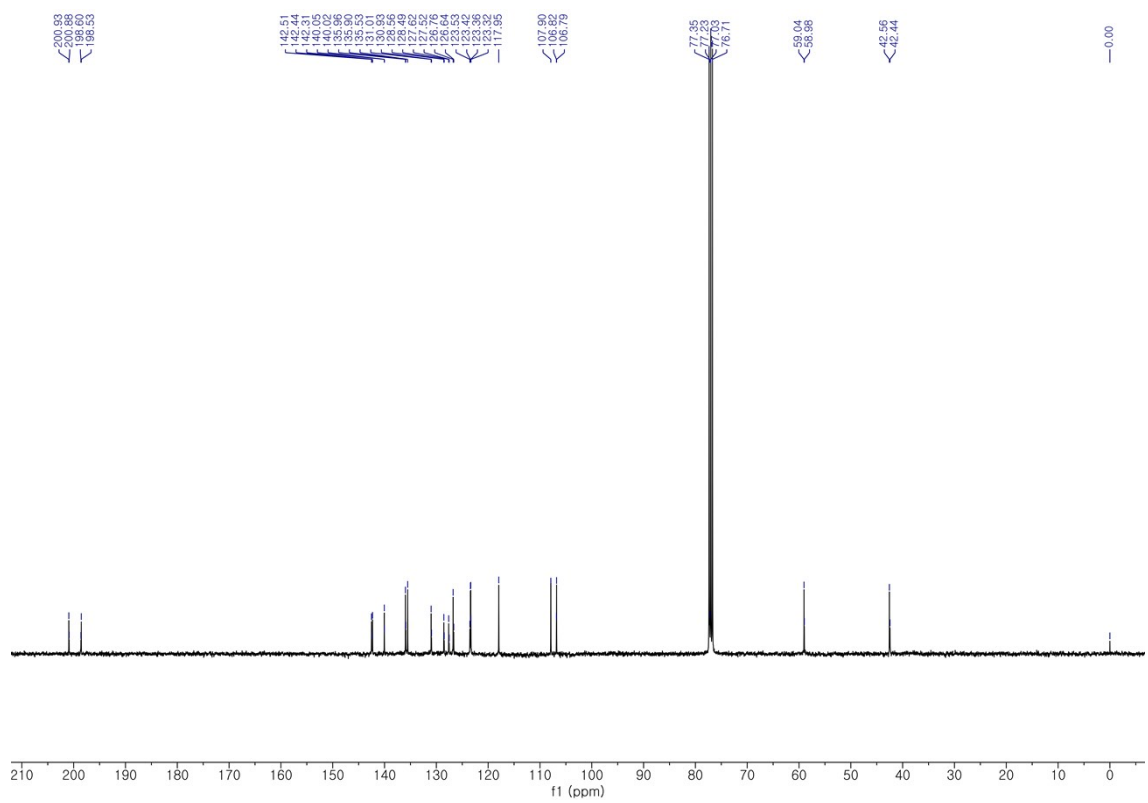

**Figure S2.**  $^{13}\text{C}$  NMR spectrum of compound **3** in  $\text{CDCl}_3$ .

[ Mass Spectrum ]  
 Data : SJHONG-I-55 HR Date : 10-Jul-2019 10:24  
 RT : 1.27 min Scan# : 34  
 Elements : C 34/0, H 69/0, N 2/0, O 4/0  
 Mass Tolerance : 1000ppm, 5mmu if m/z < 5, 50mmu if m/z > 50  
 Unsaturation (U.S.) : -0.5 - 50.0

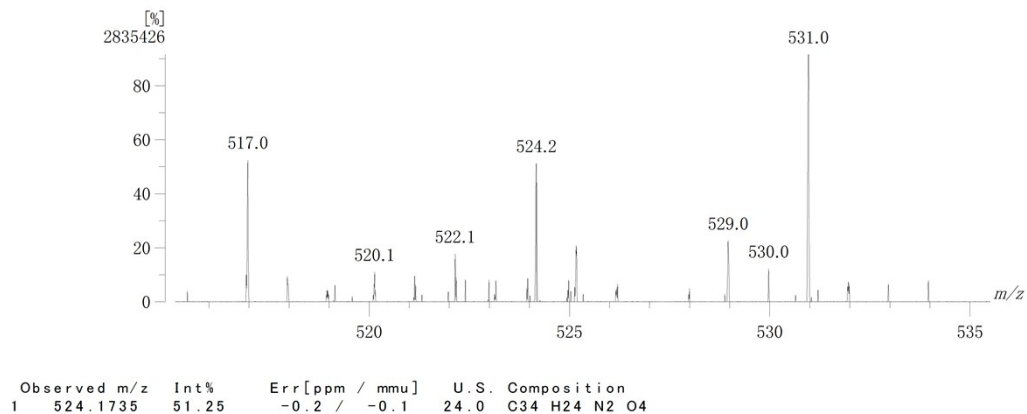

**Figure S3.** EI MS spectrum of compound **3**.

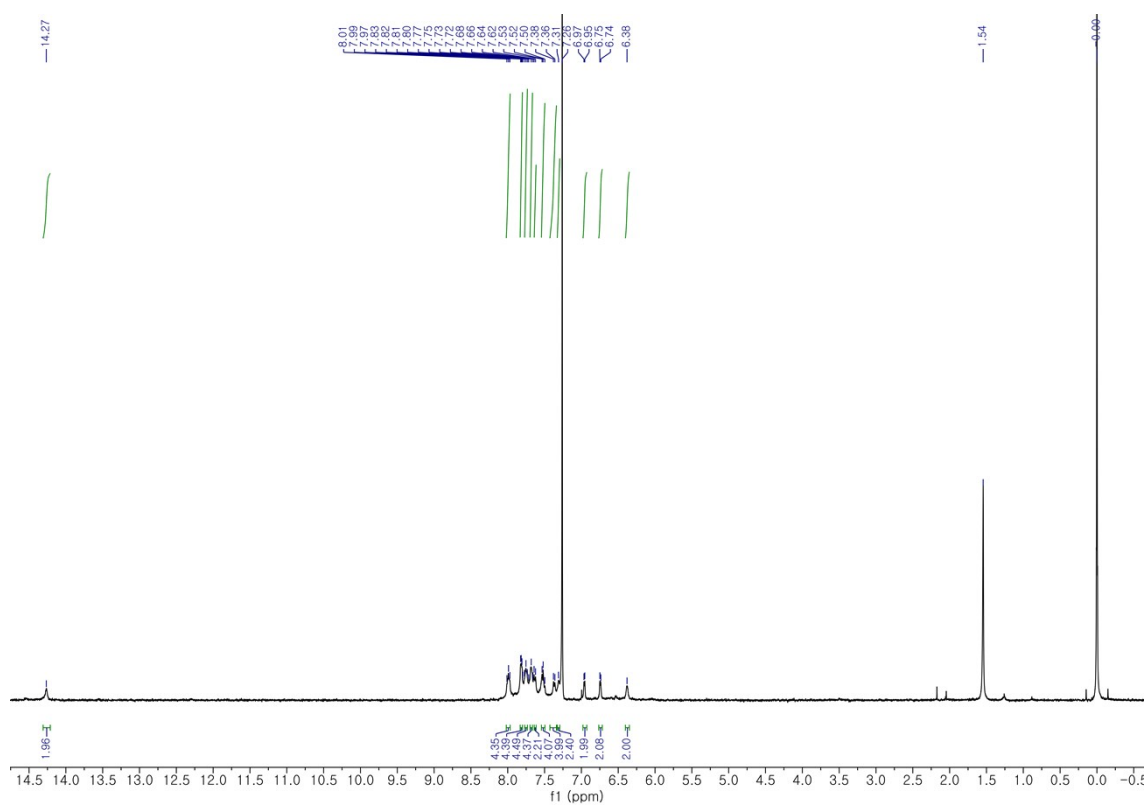

**Figure S4.**  $^1\text{H}$  NMR spectrum of compound **5** in  $\text{CDCl}_3$ .

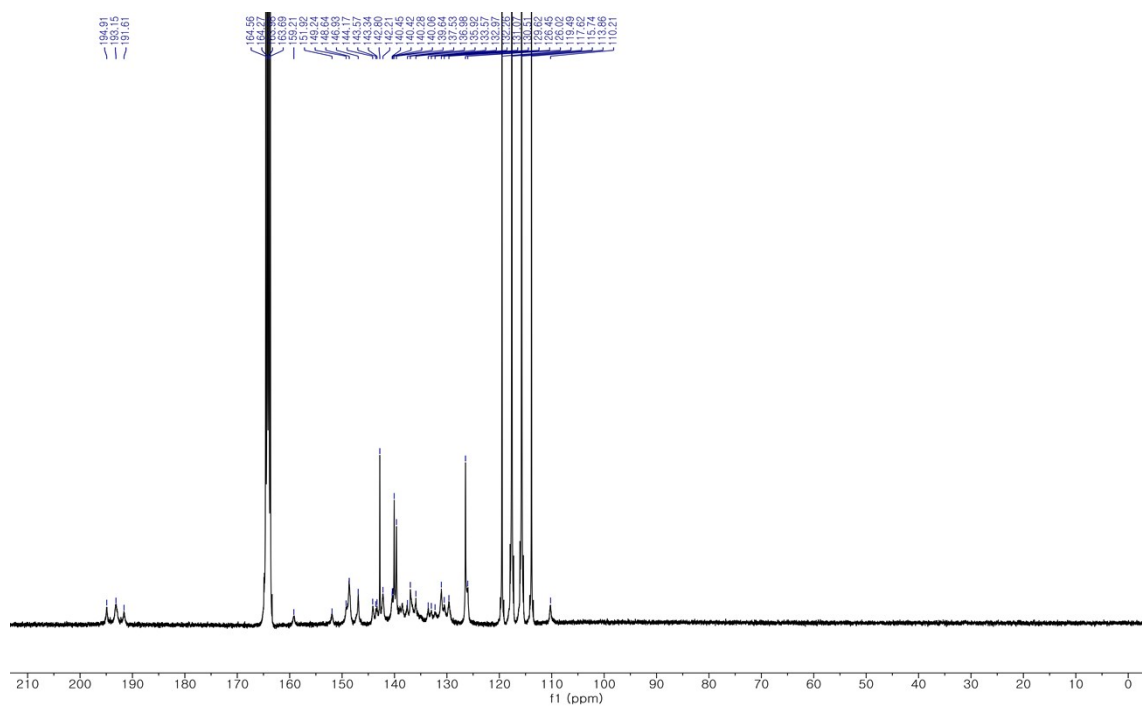

**Figure S5.**  $^{13}\text{C}$  NMR spectrum of compound **5** in TFA-*d*.

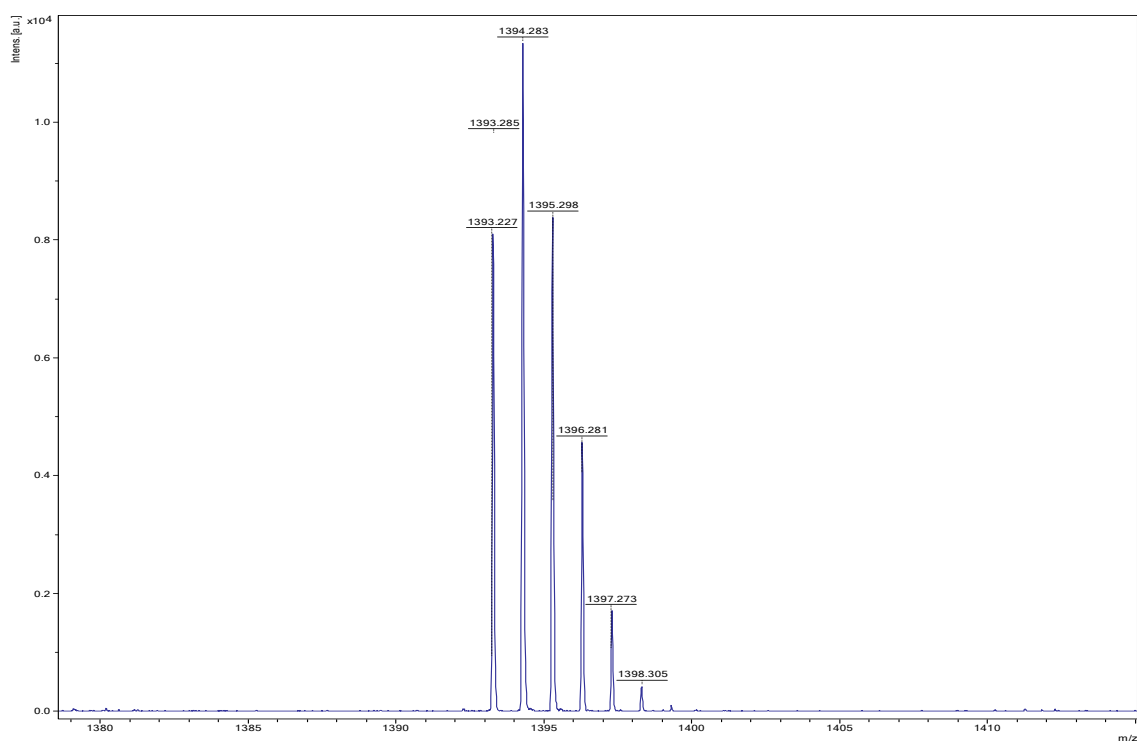

**Figure S6.** MALDI-TOF MS spectrum of compound **5**.

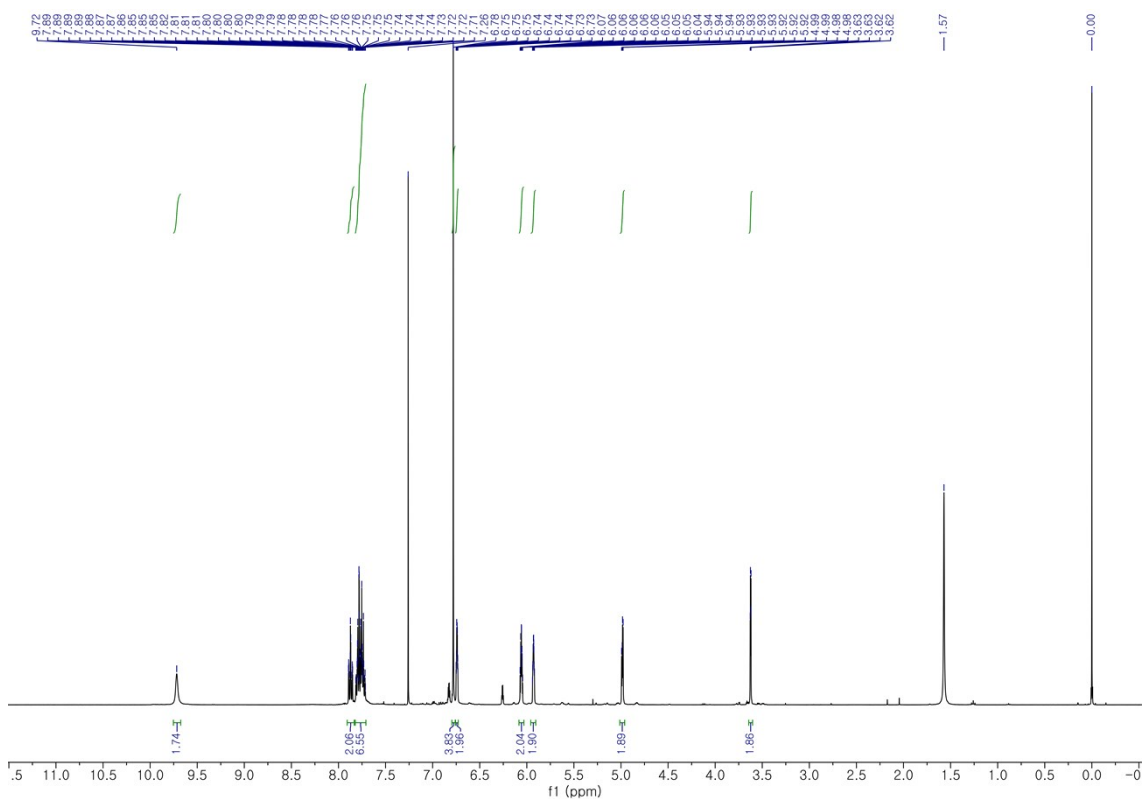

Figure S7.  $^1\text{H}$  NMR spectrum of compound **4** in  $\text{CDCl}_3$ .

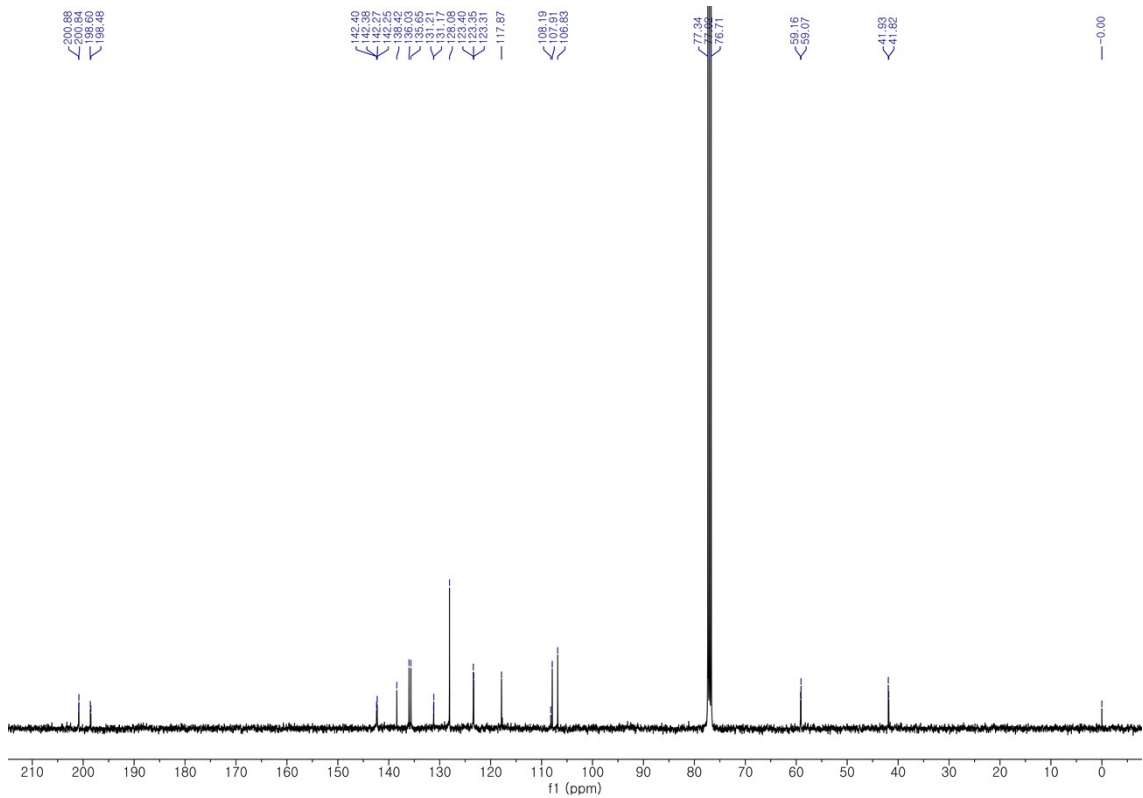

Figure S8.  $^{13}\text{C}$  NMR spectrum of compound **4** in  $\text{CDCl}_3$ .



[ Mass Spectrum ]  
 Data : SJHONG-I-71 HR Date : 10-Jul-2019 10:40  
 RT : 1.46 min Scan# : 39  
 Elements : C 34/0, H 69/0, N 2/0, O 4/0  
 Mass Tolerance : 1000ppm, 5mmu if m/z < 5, 50mmu if m/z > 50  
 Unsaturation (U.S.) : -0.5 - 50.0

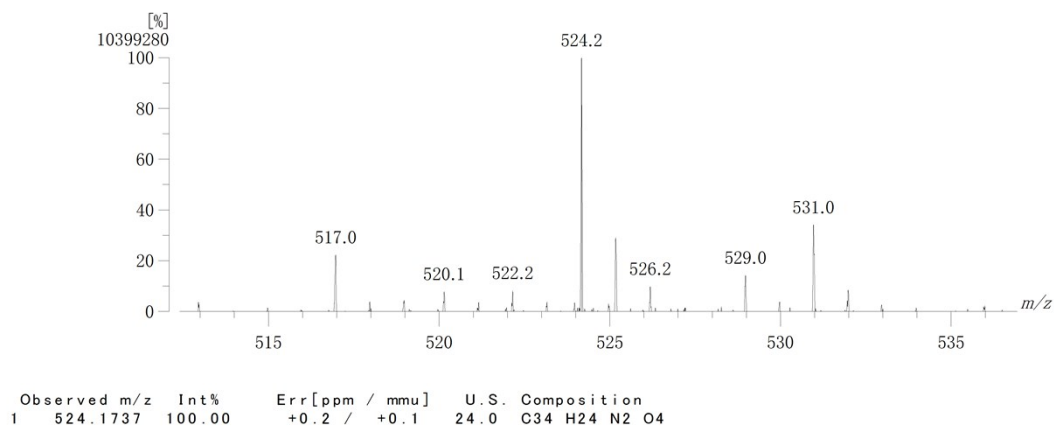

Figure S9. EI MS spectrum of compound 4.

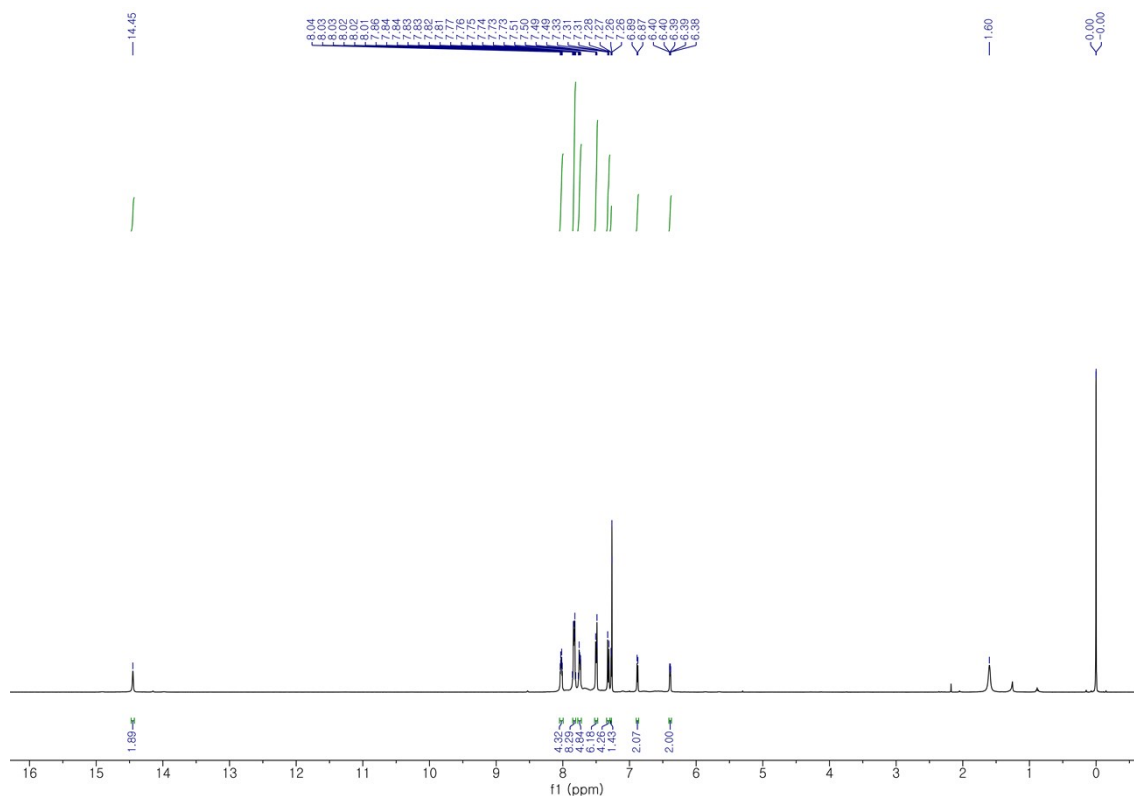

Figure S10. <sup>1</sup>H NMR spectrum of compound 6 in CDCl<sub>3</sub>.

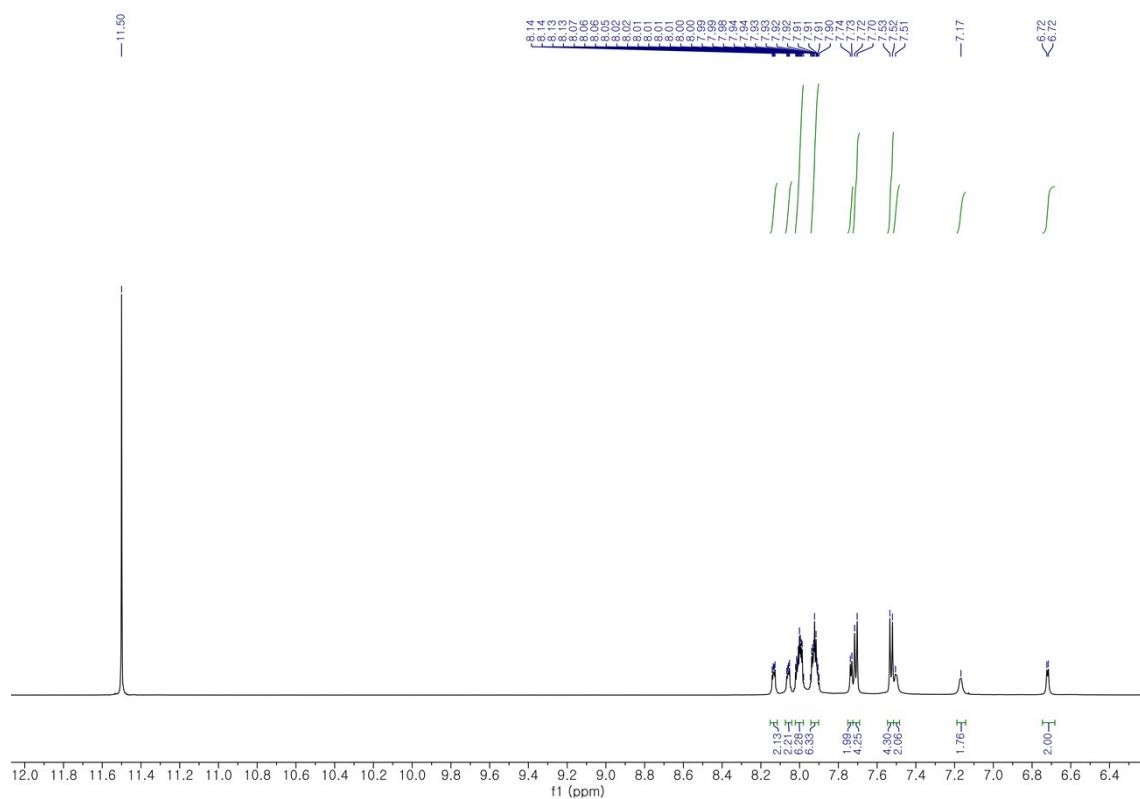

**Figure S11.**  $^1\text{H}$  NMR spectrum of compound **6** in  $\text{TFA-d}$ .

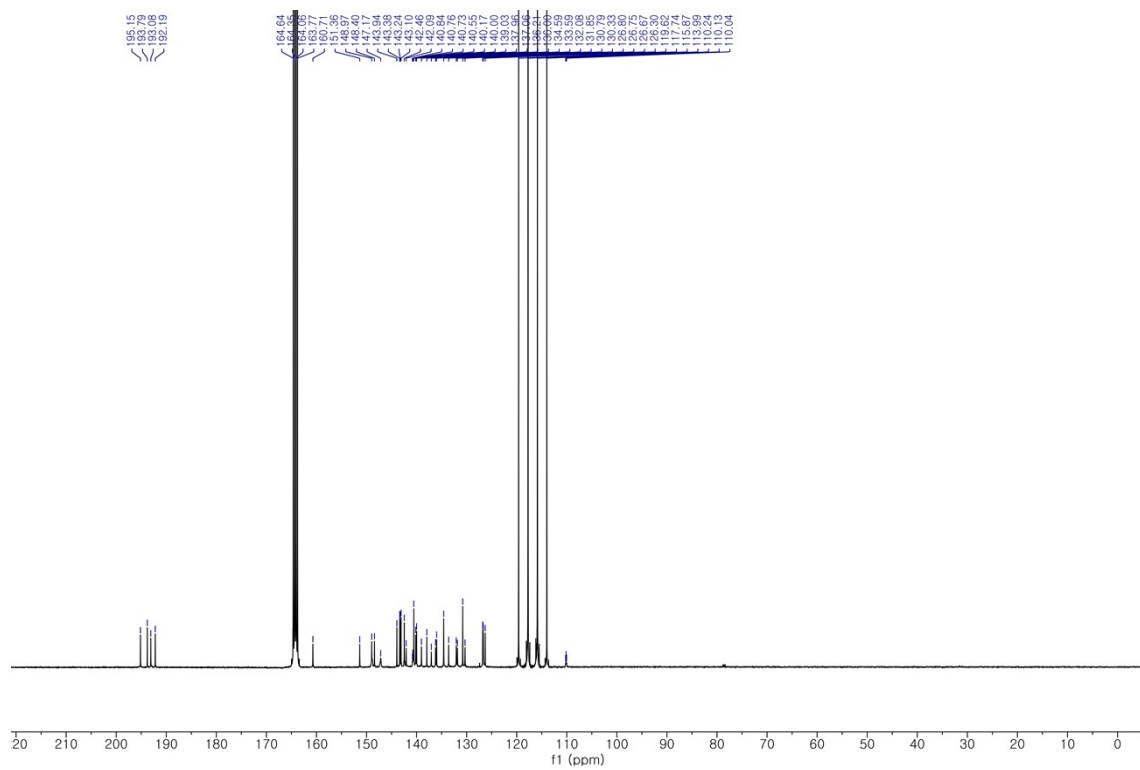

**Figure S12.**  $^{13}\text{C}$  NMR spectrum of compound **6** in  $\text{TFA-d}$ .

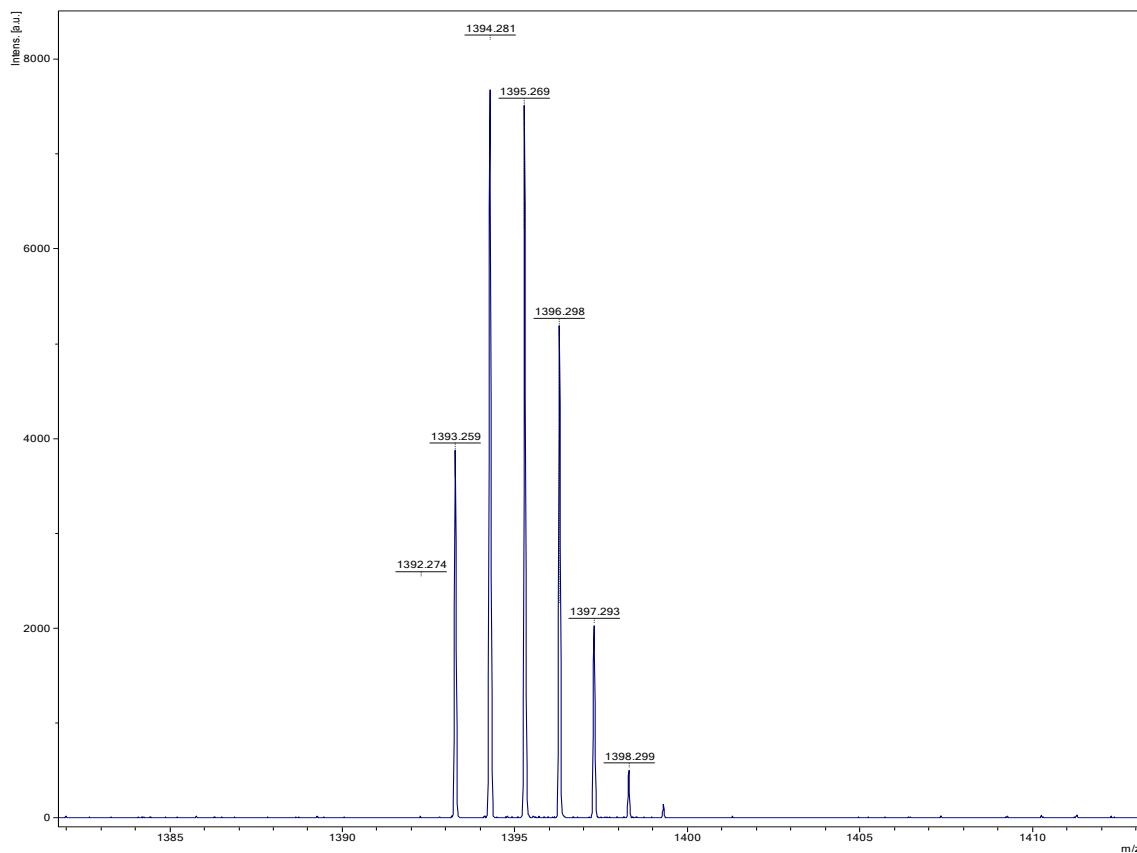

**Figure S13.** MALDI-TOF MS spectrum of compound **6**.

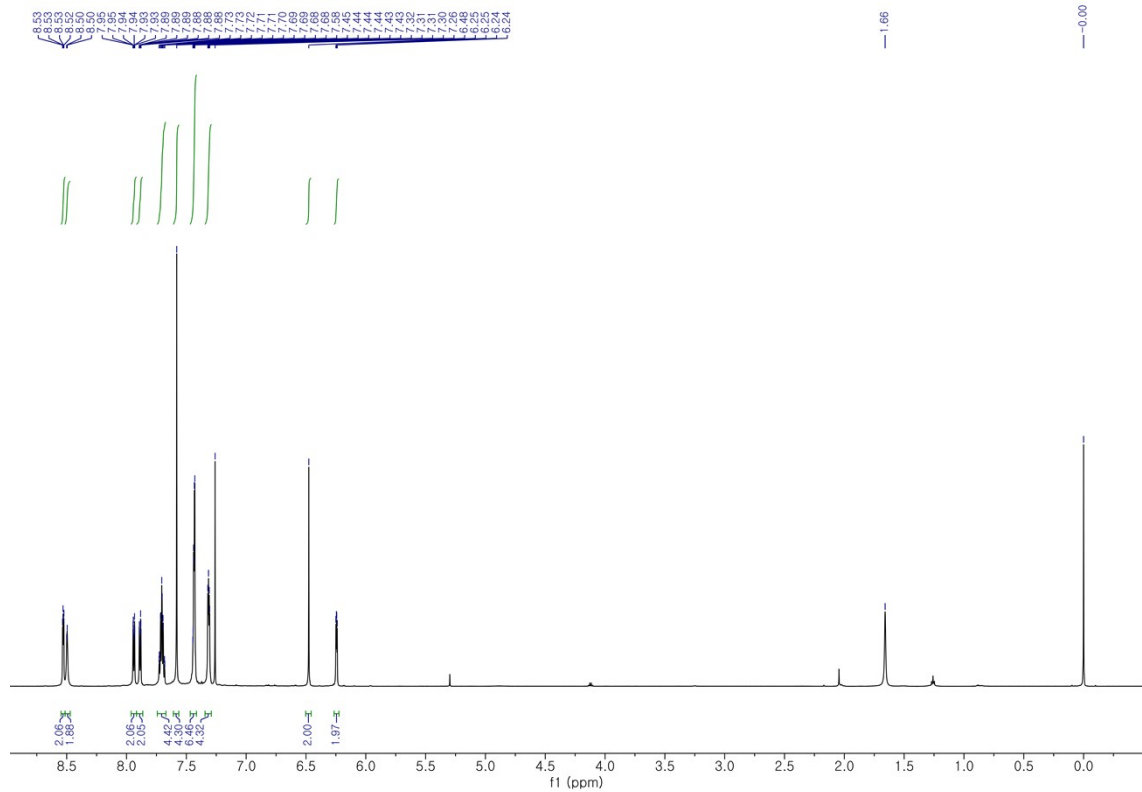

Figure S14.  $^1\text{H}$  NMR spectrum of compound 7 in  $\text{CDCl}_3$ .

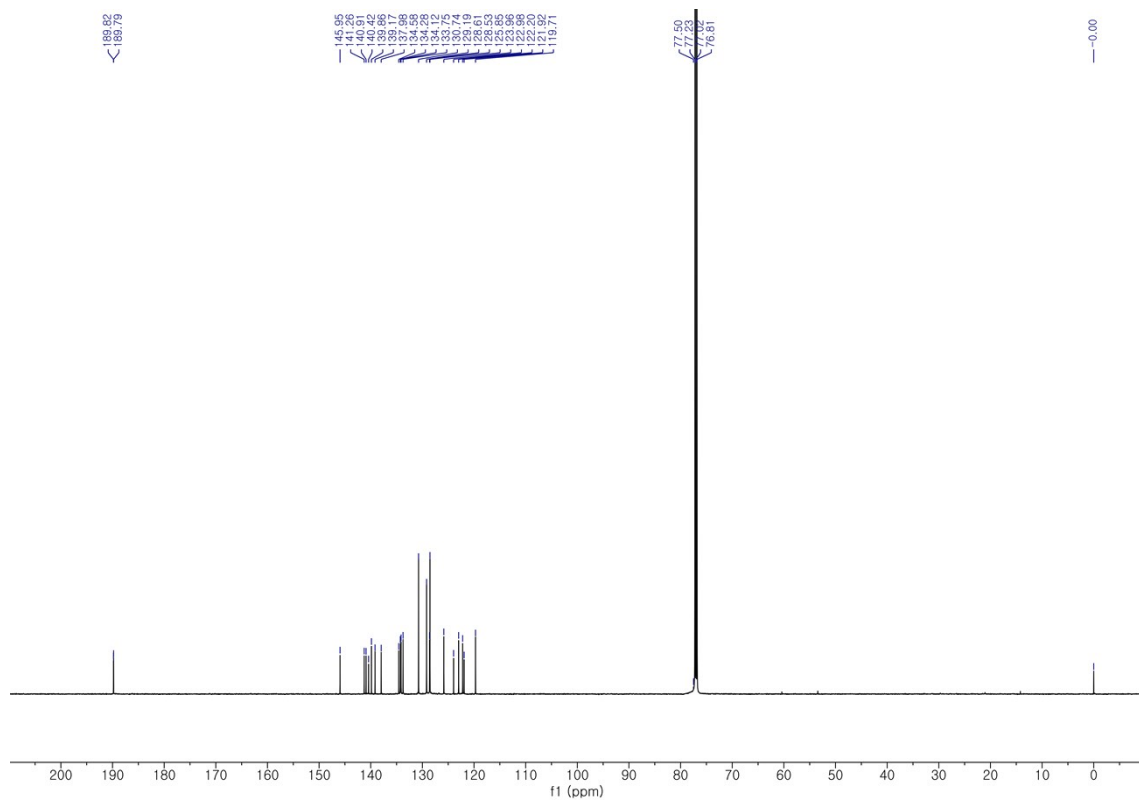

Figure S15.  $^{13}\text{C}$  NMR spectrum of compound 7 in  $\text{CDCl}_3$ .

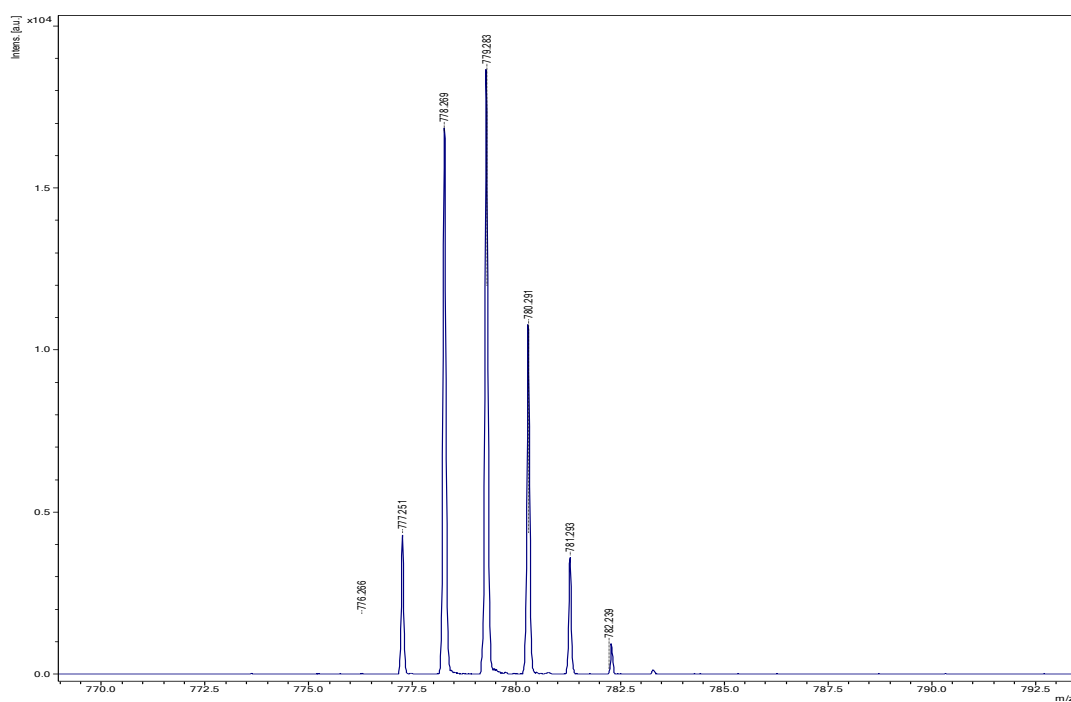

**Figure S16.** MALDI-TOF MS spectrum of compound 7.

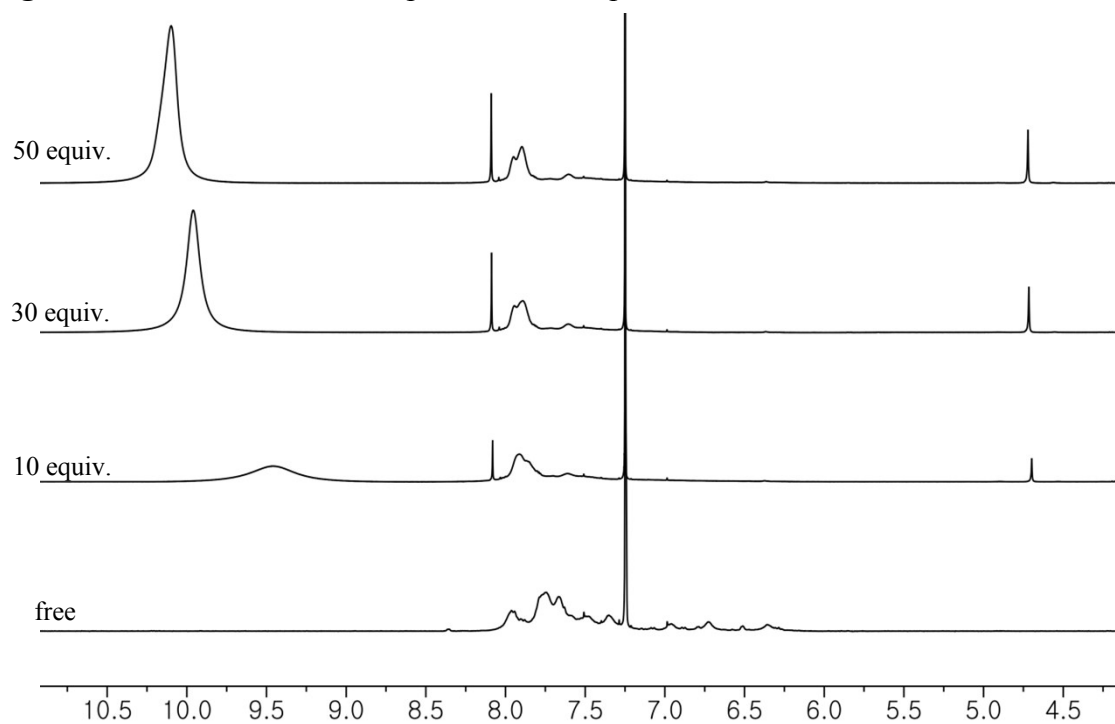

**Figure S17.** Partial  $^1\text{H}$  NMR spectral changes observed when compound 5 is subject to treatment with TFA in  $\text{CDCl}_3$  ( $8.37 \times 10^{-3}$  M) at  $50^\circ\text{C}$ . The new resonance at 4.72 ppm is ascribed to protonation at the *meso*- $\alpha$ -position.

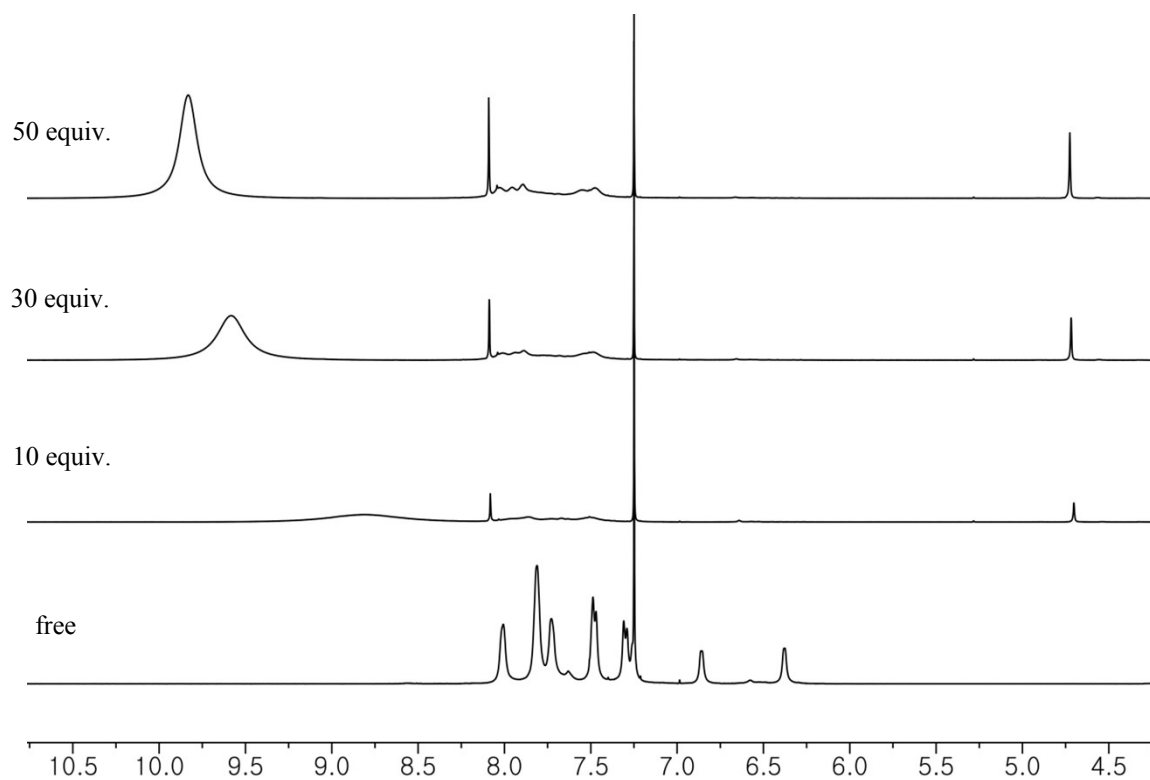

**Figure S18.** Partial <sup>1</sup>H NMR spectral changes observed when compound **6** is treated with TFA in CDCl<sub>3</sub> ( $8.37 \times 10^{-3}$  M) at 50 °C. The new resonance at 4.72 ppm is ascribed to protonation at the *meso*- $\alpha$ -position.

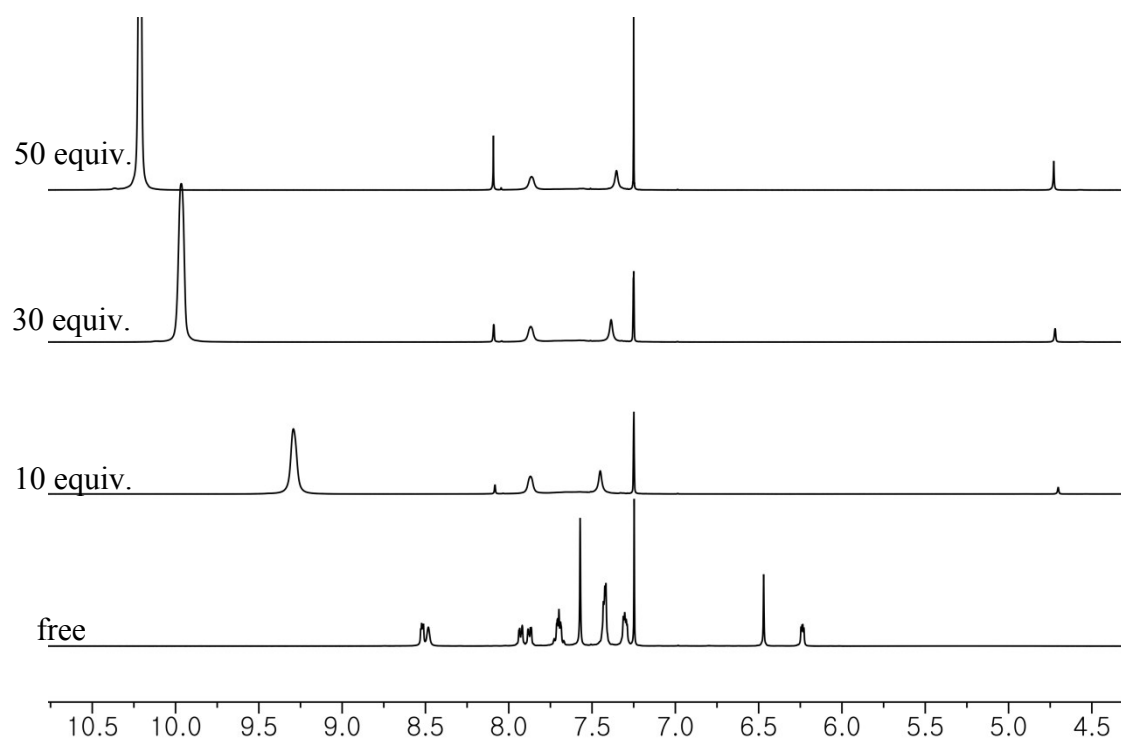

**Figure S19.** Partial  $^1\text{H}$  NMR spectral changes observed when compound **7** is treated with TFA in  $\text{CDCl}_3$  ( $1.07 \times 10^{-2}$  M) at  $50^\circ\text{C}$ . The new resonance at 4.72 ppm results from protonation at the *meso*- $\alpha$ -position.

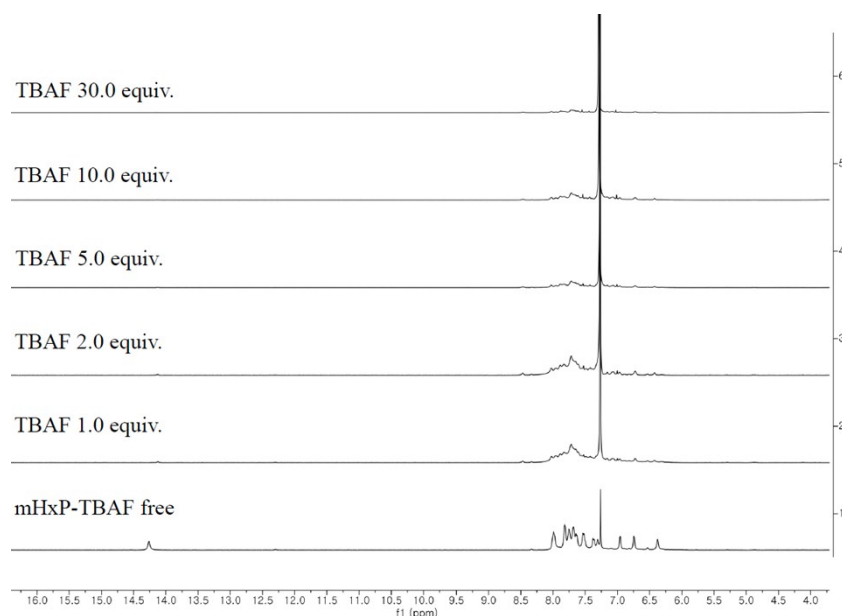

**Figure S20.** Partial  $^1\text{H}$  NMR spectral changes observed when compound **5** ( $8.37 \times 10^{-3}$  M) is subject to treatment with TBAF in  $\text{CDCl}_3$  at room temperature.

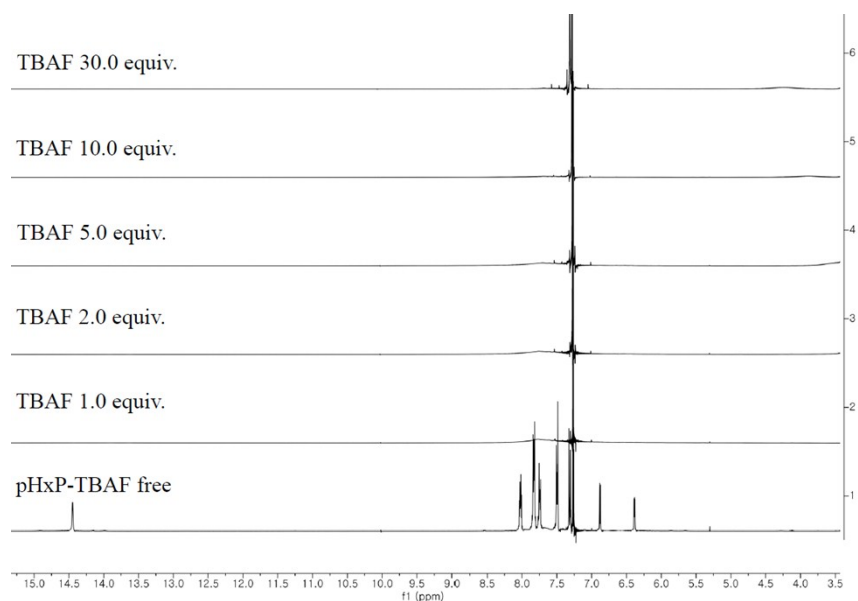

**Figure S21.** Partial  $^1\text{H}$  NMR spectral changes observed when compound **6** ( $8.37 \times 10^{-3}$  M) is subject to treatment with TBAF in  $\text{CDCl}_3$  at room temperature.

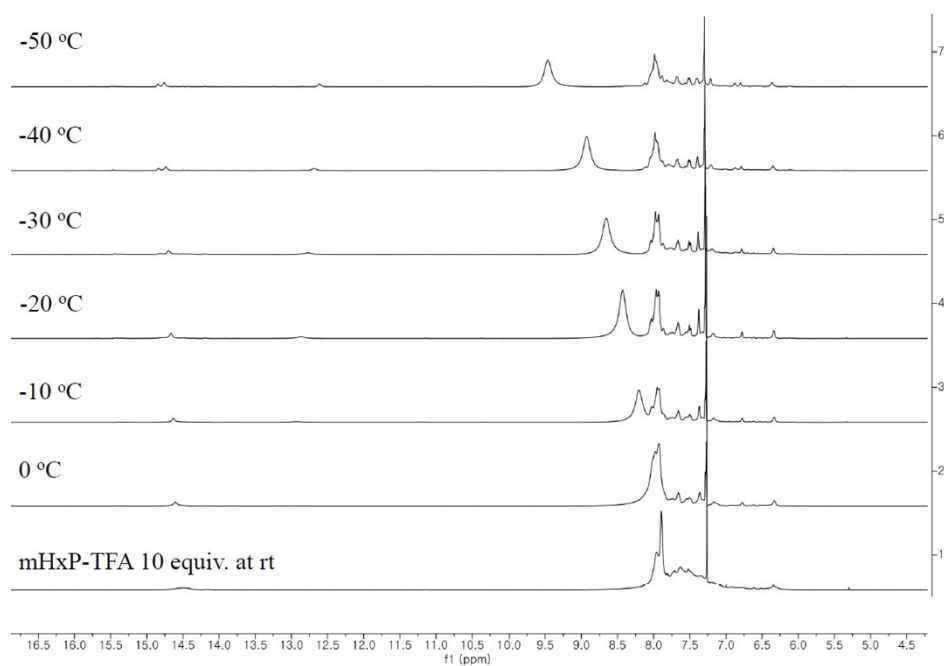

**Figure S22.** Partial  $^1\text{H}$  NMR spectral changes of compound **5** ( $8.37 \times 10^{-3}$  M) in the presence of 10 equiv. of TFA in  $\text{CDCl}_3$  at low temperatures.



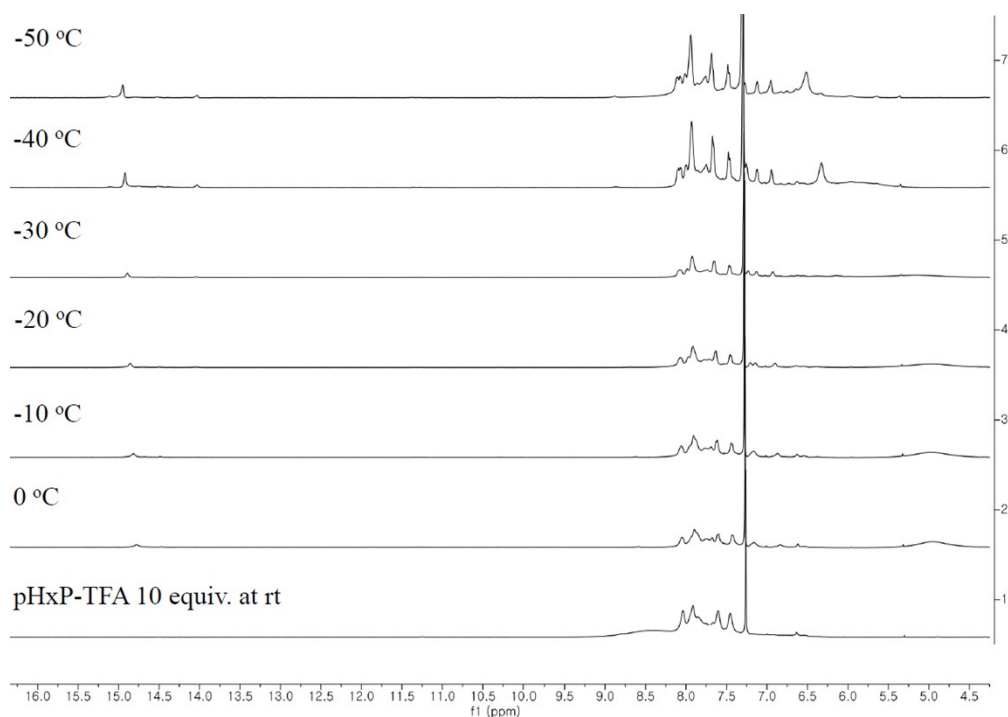

**Figure S23.** Partial <sup>1</sup>H NMR spectral changes of compound **6** (8.37 × 10<sup>-3</sup> M) in the presence of 10 equiv. of TFA in CDCl<sub>3</sub> at low temperatures.

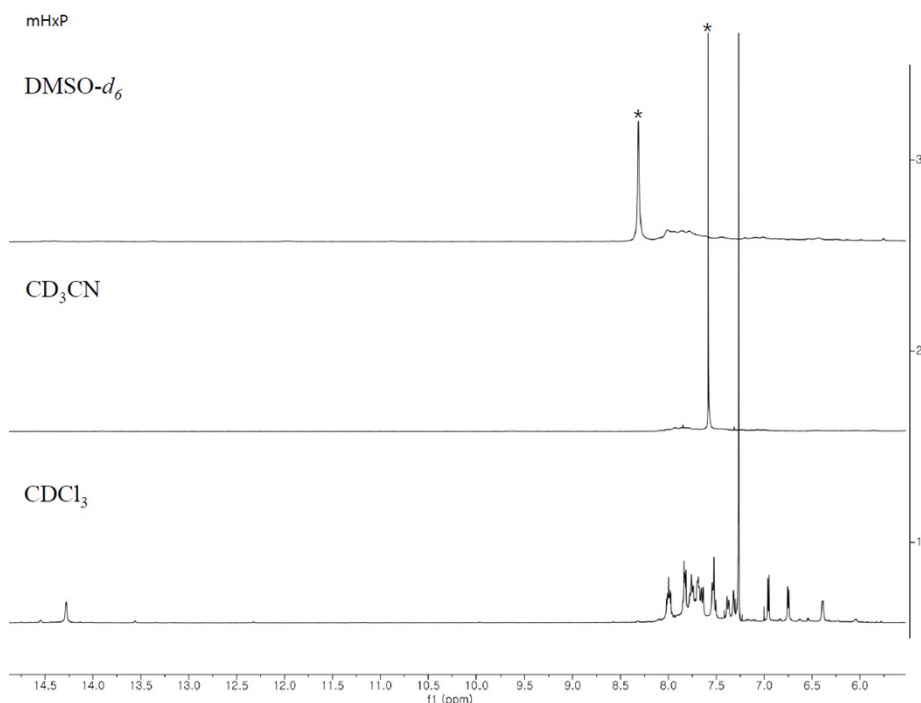

**Figure S24.** Partial <sup>1</sup>H NMR spectra of compound **5** (8.37 × 10<sup>-3</sup> M) in different solvents. Signals marked with (\*) denote residual CHCl<sub>3</sub> solvent signals.

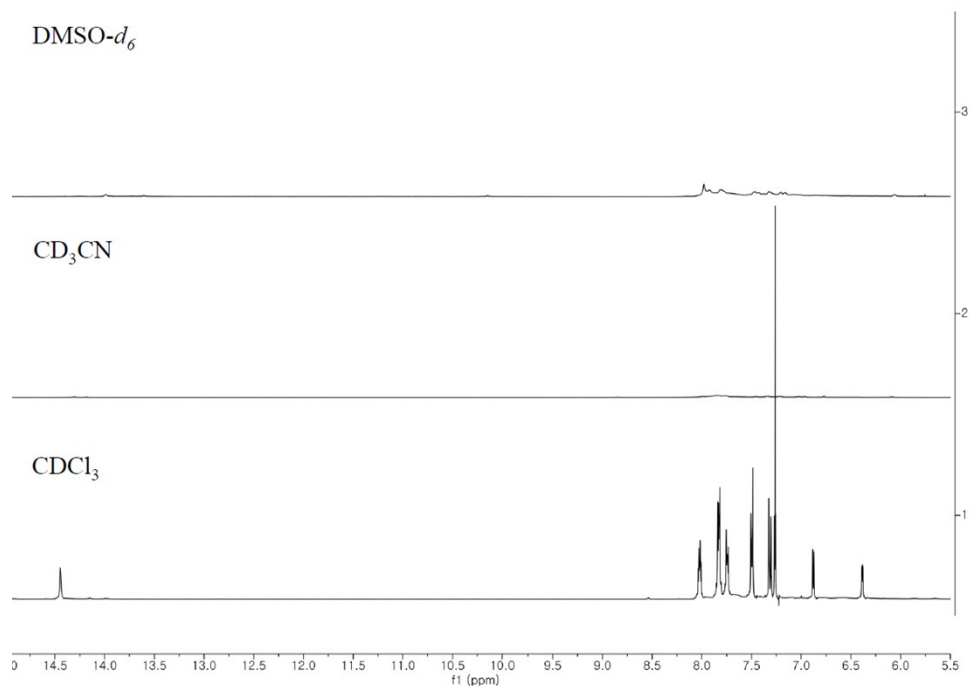

**Figure S25.** Partial  $^1\text{H}$  NMR spectra of compound **6** ( $8.37 \times 10^{-3}$  M) in different solvents.

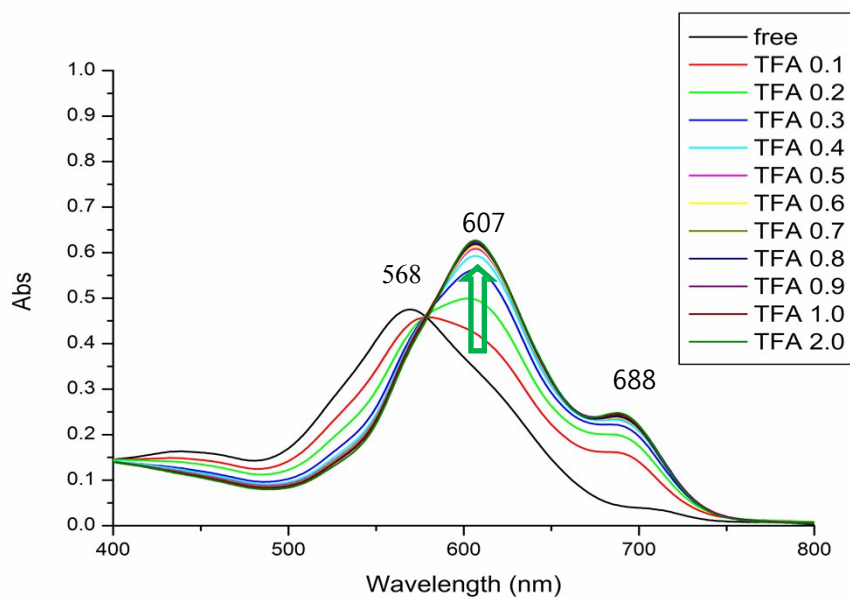

**Figure S26.** UV-vis spectral changes seen when **5** ( $4.31 \times 10^{-6}$  M) is treated with TFA in  $\text{CH}_2\text{Cl}_2$ .

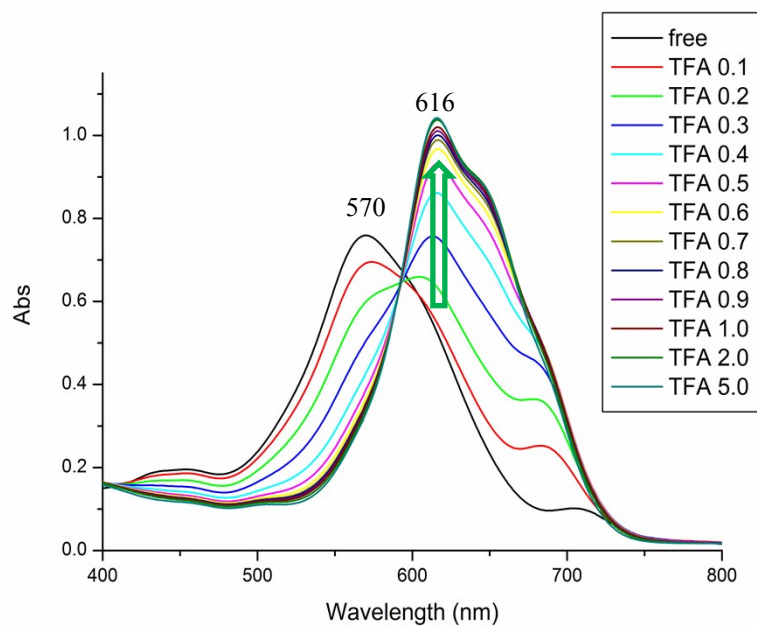

**Figure S27.** UV-vis spectral changes observed when **6** ( $4.31 \times 10^{-6}$  M) is subject to treatment with TFA in  $\text{CH}_2\text{Cl}_2$ .

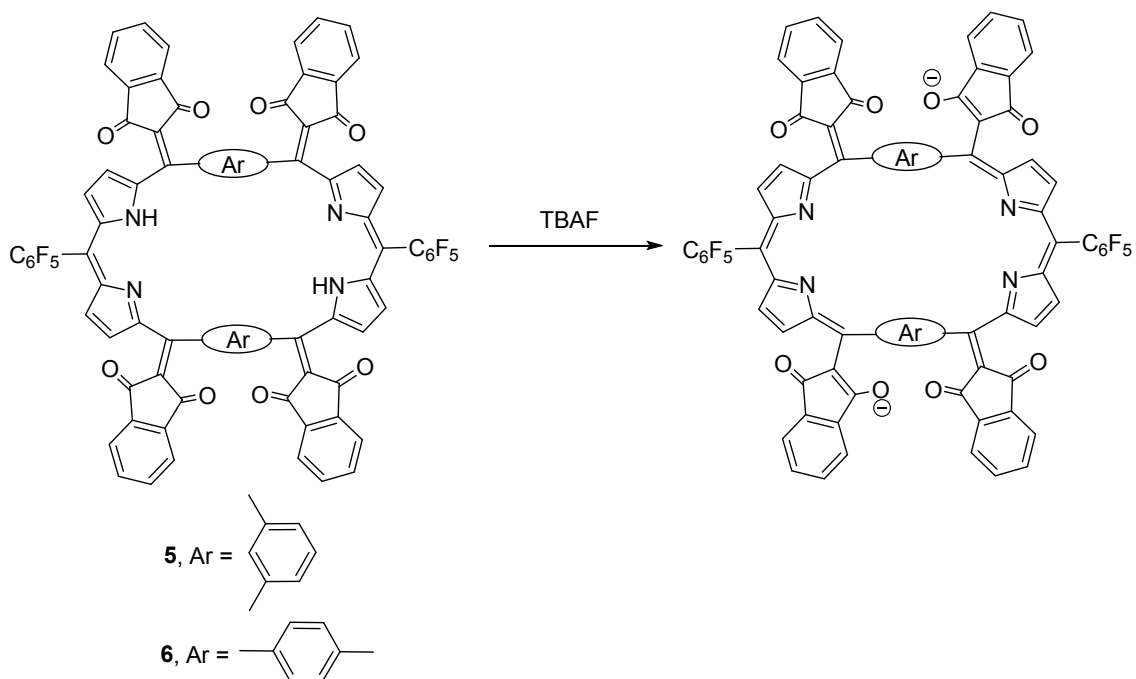

**Scheme S1.** Possible chemical structures generated from **5** and **6** upon treatment with TBAF.

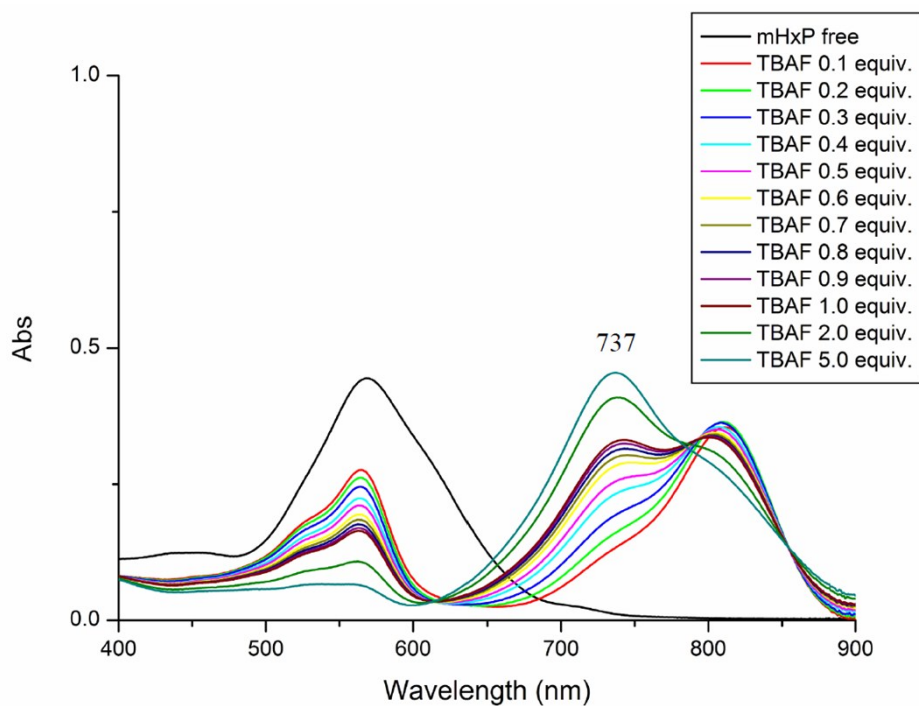

**Figure S28.** UV-vis spectral changes observed when **5** ( $4.31 \times 10^{-6}$  M) is subject to treatment with TBAF in CH<sub>2</sub>Cl<sub>2</sub>.

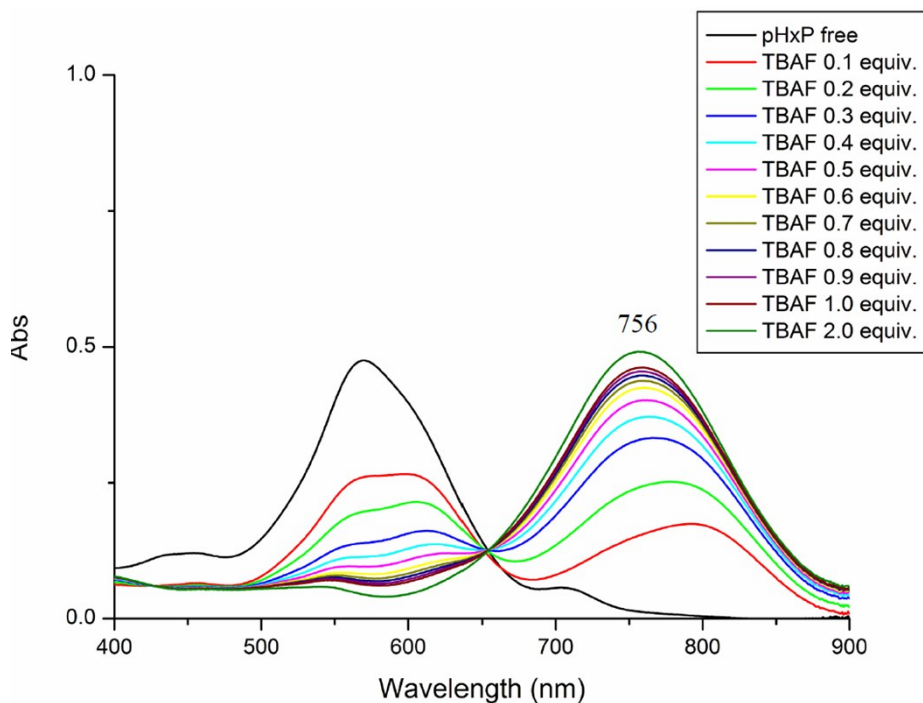

**Figure S29.** UV-vis spectral changes observed when **6** ( $2.87 \times 10^{-6}$  M) is subject to treatment with TBAF in CH<sub>2</sub>Cl<sub>2</sub>.

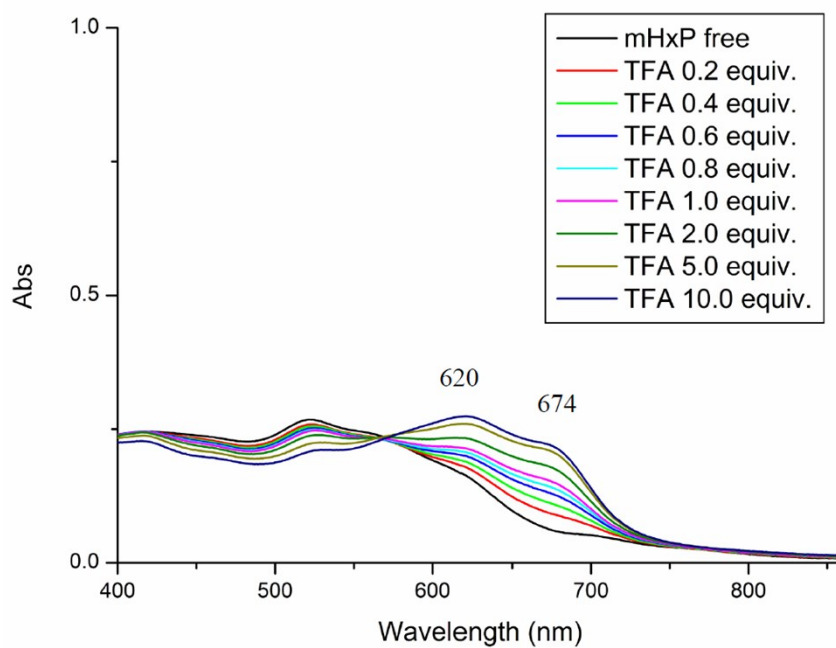

**Figure S30.** UV-vis spectral changes observed when **5** ( $4.31 \times 10^{-6}$  M) is subject to treatment with TFA in CH<sub>3</sub>CN.

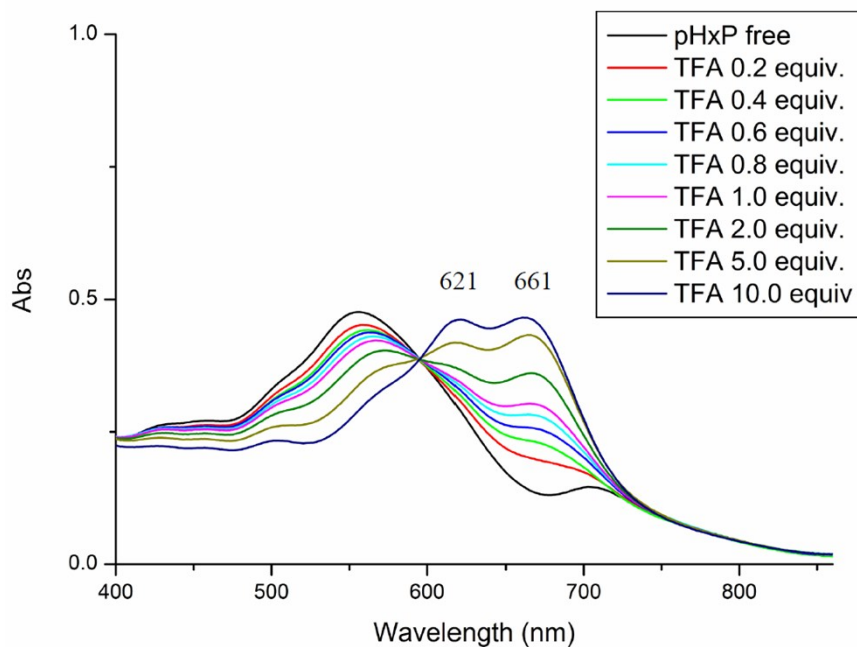

**Figure S31.** UV-vis spectral changes observed when **6** ( $2.87 \times 10^{-6}$  M) is subject to treatment with TFA in CH<sub>3</sub>CN.

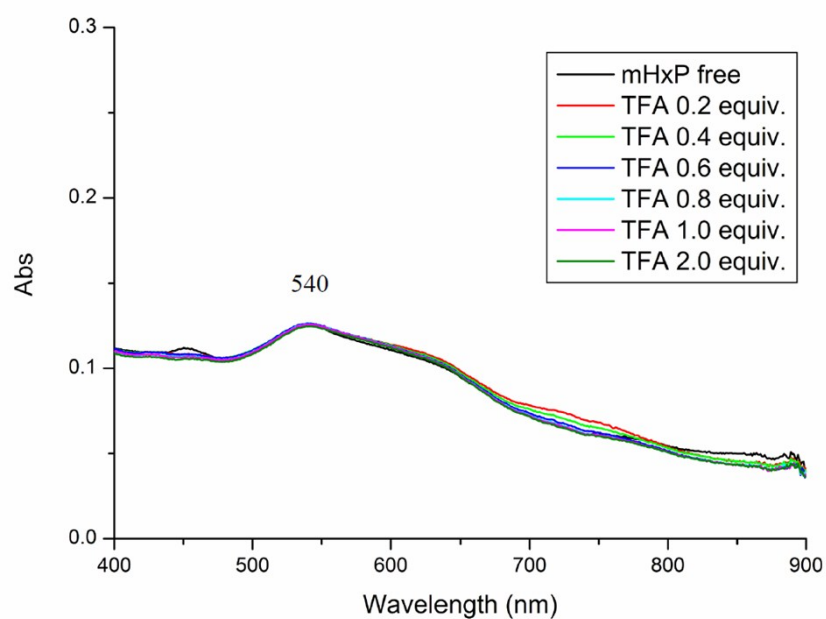

**Figure S32.** UV-vis spectral changes observed when **5** ( $4.31 \times 10^{-6}$  M) is subject to treatment with TFA in DMSO.

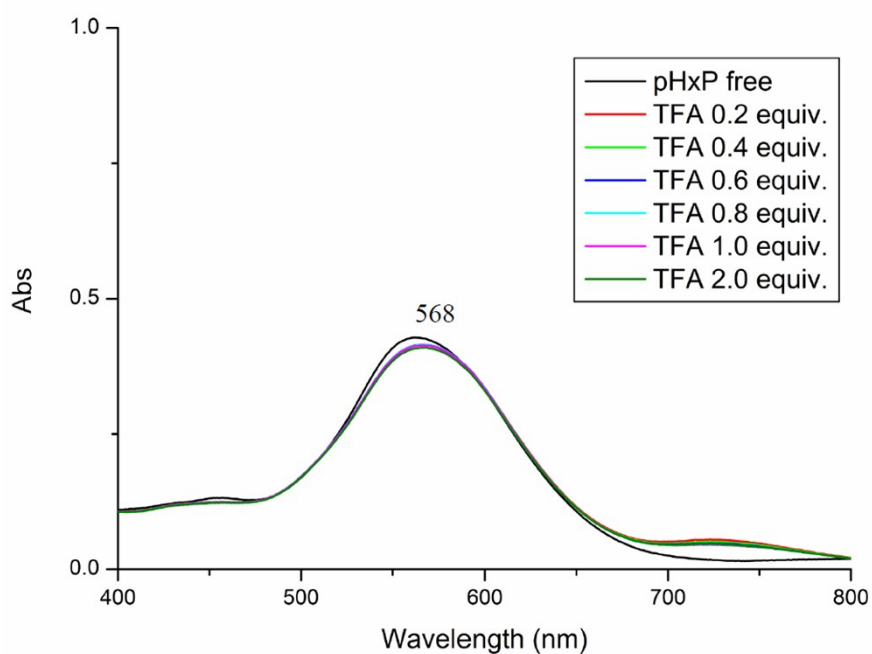

**Figure S33.** UV-vis spectral changes observed when **6** ( $2.87 \times 10^{-6}$  M) is subject to treatment with TFA in DMSO.

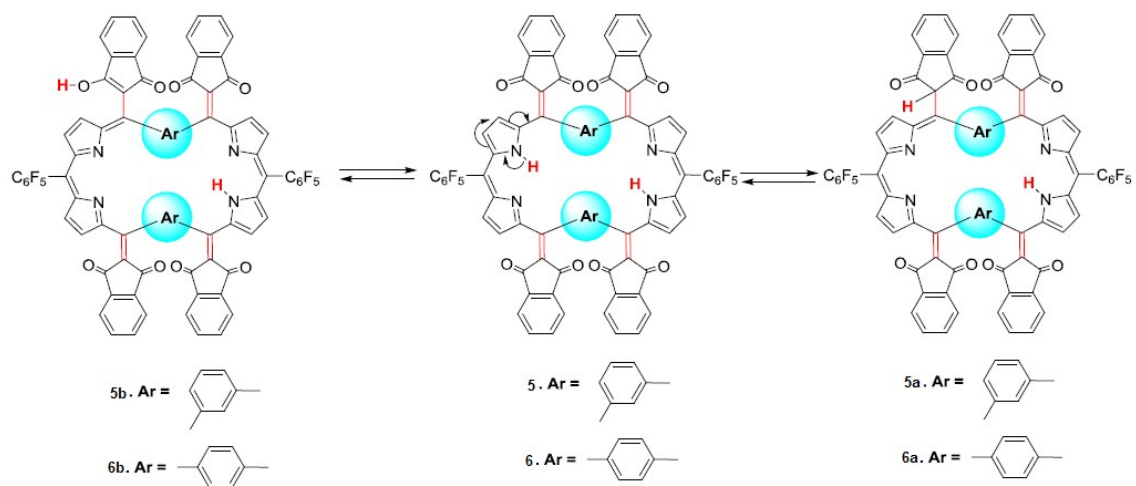

**Scheme S2.** Possible tautomeric forms of compounds **5** and **6**.

## Crystallographic data

**Table S1 Crystal data and structure refinement for compound 6.**

|                                             |                                                                                                  |
|---------------------------------------------|--------------------------------------------------------------------------------------------------|
| Identification code                         | Compound 6                                                                                       |
| Empirical formula                           | C <sub>168</sub> H <sub>72</sub> Cl <sub>12</sub> F <sub>20</sub> N <sub>8</sub> O <sub>16</sub> |
| Formula weight                              | 3263.73                                                                                          |
| Temperature/K                               | 99.95(18)                                                                                        |
| Crystal system                              | monoclinic                                                                                       |
| Space group                                 | P2 <sub>1</sub> /c                                                                               |
| a/Å                                         | 19.5016(3)                                                                                       |
| b/Å                                         | 35.2797(7)                                                                                       |
| c/Å                                         | 23.3317(6)                                                                                       |
| α/°                                         | 90                                                                                               |
| β/°                                         | 90.269(2)                                                                                        |
| γ/°                                         | 90                                                                                               |
| Volume/Å <sup>3</sup>                       | 16052.3(6)                                                                                       |
| Z                                           | 4                                                                                                |
| ρ <sub>calc</sub> /cm <sup>3</sup>          | 1.350                                                                                            |
| μ/mm <sup>-1</sup>                          | 2.647                                                                                            |
| F(000)                                      | 6592.0                                                                                           |
| Crystal size/mm <sup>3</sup>                | 0.152 × 0.091 × 0.069                                                                            |
| Radiation                                   | CuKα (λ = 1.54184 Å)                                                                             |
| 2θ range for data collection/°              | 4.532 to 148.312                                                                                 |
| Index ranges                                | -23 ≤ h ≤ 22, -37 ≤ k ≤ 42, -28 ≤ l ≤ 27                                                         |
| Reflections collected                       | 91104                                                                                            |
| Independent reflections                     | 31428 [R <sub>int</sub> = 0.0941, R <sub>sigma</sub> = 0.1222]                                   |
| Data/restraints/parameters                  | 31428/0/2017                                                                                     |
| Goodness-of-fit on F <sup>2</sup>           | 1.008                                                                                            |
| Final R indexes [I ≥ 2σ (I)]                | R <sub>1</sub> = 0.0943, wR <sub>2</sub> = 0.2450                                                |
| Final R indexes [all data]                  | R <sub>1</sub> = 0.1770, wR <sub>2</sub> = 0.3053                                                |
| Largest diff. peak/hole / e Å <sup>-3</sup> | 0.91/-0.93                                                                                       |
| CCDC number                                 | 1921511                                                                                          |



**Table S2 Crystal data and structure refinement for compound 6•2TFA.**

|                                             |                                                               |
|---------------------------------------------|---------------------------------------------------------------|
| Identification code                         | Compound <b>6•2TFA</b>                                        |
| Empirical formula                           | C <sub>18</sub> H <sub>15</sub> ClFN <sub>4</sub> O           |
| Formula weight                              | 303.34                                                        |
| Temperature/K                               | 100.15                                                        |
| Crystal system                              | triclinic                                                     |
| Space group                                 | P-1                                                           |
| a/Å                                         | 12.9539(16)                                                   |
| b/Å                                         | 14.4757(18)                                                   |
| c/Å                                         | 14.7250(18)                                                   |
| α/°                                         | 70.698(3)                                                     |
| β/°                                         | 66.001(3)                                                     |
| γ/°                                         | 67.022(3)                                                     |
| Volume/Å <sup>3</sup>                       | 2273.4(5)                                                     |
| Z                                           | 2                                                             |
| ρ <sub>calc</sub> /cm <sup>3</sup>          | 0.443                                                         |
| μ/mm <sup>-1</sup>                          | 0.029                                                         |
| F(000)                                      | 318.0                                                         |
| Crystal size/mm <sup>3</sup>                | 0.54 × 0.46 × 0.33                                            |
| Radiation                                   | MoKα (λ = 0.71073 Å)                                          |
| 2Θ range for data collection/°              | 5.986 to 50.7                                                 |
| Index ranges                                | -15 ≤ h ≤ 15, -16 ≤ k ≤ 17, -17 ≤ l ≤ 17                      |
| Reflections collected                       | 32004                                                         |
| Independent reflections                     | 8323 [R <sub>int</sub> = 0.0324, R <sub>sigma</sub> = 0.0278] |
| Data/restraints/parameters                  | 8323/88/663                                                   |
| Goodness-of-fit on F <sup>2</sup>           | 1.058                                                         |
| Final R indexes [I ≥ 2σ (I)]                | R <sub>1</sub> = 0.0478, wR <sub>2</sub> = 0.1351             |
| Final R indexes [all data]                  | R <sub>1</sub> = 0.0531, wR <sub>2</sub> = 0.1395             |
| Largest diff. peak/hole / e Å <sup>-3</sup> | 0.54/-0.65                                                    |
| CCDC number                                 | 1921509                                                       |

**Table S3 Crystal data and structure refinement for compound 7.**

|                                             |                                                                                 |
|---------------------------------------------|---------------------------------------------------------------------------------|
| Identification code                         | Compound 7                                                                      |
| Empirical formula                           | C <sub>53</sub> H <sub>31</sub> Cl <sub>3</sub> N <sub>2</sub> O <sub>4</sub> S |
| Formula weight                              | 898.21                                                                          |
| Temperature/K                               | 100.00(10)                                                                      |
| Crystal system                              | triclinic                                                                       |
| Space group                                 | P-1                                                                             |
| a/Å                                         | 11.9568(7)                                                                      |
| b/Å                                         | 12.3682(8)                                                                      |
| c/Å                                         | 14.6936(10)                                                                     |
| α/°                                         | 109.732(6)                                                                      |
| β/°                                         | 92.669(5)                                                                       |
| γ/°                                         | 92.147(5)                                                                       |
| Volume/Å <sup>3</sup>                       | 2039.9(2)                                                                       |
| Z                                           | 2                                                                               |
| ρ <sub>calc</sub> /cm <sup>3</sup>          | 1.462                                                                           |
| μ/mm <sup>-1</sup>                          | 2.945                                                                           |
| F(000)                                      | 924.0                                                                           |
| Crystal size/mm <sup>3</sup>                | 0.54 × 0.32 × 0.31                                                              |
| Radiation                                   | CuKα (λ = 1.54184 Å)                                                            |
| 2Θ range for data collection/°              | 6.404 to 151.78                                                                 |
| Index ranges                                | -14 ≤ h ≤ 14, -15 ≤ k ≤ 15, -18 ≤ l ≤ 17                                        |
| Reflections collected                       | 18981                                                                           |
| Independent reflections                     | 8001 [R <sub>int</sub> = 0.0835, R <sub>sigma</sub> = 0.1040]                   |
| Data/restraints/parameters                  | 8001/0/568                                                                      |
| Goodness-of-fit on F <sup>2</sup>           | 1.085                                                                           |
| Final R indexes [I ≥ 2σ (I)]                | R <sub>1</sub> = 0.0885, wR <sub>2</sub> = 0.2358                               |
| Final R indexes [all data]                  | R <sub>1</sub> = 0.1232, wR <sub>2</sub> = 0.2528                               |
| Largest diff. peak/hole / e Å <sup>-3</sup> | 0.62/-1.11                                                                      |
| CCDC number                                 | 1921508                                                                         |

**Table S4 Crystal data and structure refinement for Compound 8.**

|                                             |                                                                                                |
|---------------------------------------------|------------------------------------------------------------------------------------------------|
| Identification code                         | Compound 8                                                                                     |
| Empirical formula                           | C <sub>72.89</sub> H <sub>33.78</sub> ClF <sub>8.89</sub> N <sub>3.56</sub> O <sub>10.67</sub> |
| Formula weight                              | 1298.81                                                                                        |
| Temperature/K                               | 99.97(16)                                                                                      |
| Crystal system                              | tetragonal                                                                                     |
| Space group                                 | I4 <sub>1</sub> /a                                                                             |
| a/Å                                         | 20.1536(4)                                                                                     |
| b/Å                                         | 20.1536(4)                                                                                     |
| c/Å                                         | 55.493(2)                                                                                      |
| α/°                                         | 90                                                                                             |
| β/°                                         | 90                                                                                             |
| γ/°                                         | 90                                                                                             |
| Volume/Å <sup>3</sup>                       | 22539.3(12)                                                                                    |
| Z                                           | 9                                                                                              |
| ρ <sub>calc</sub> /cm <sup>3</sup>          | 0.861                                                                                          |
| μ/mm <sup>-1</sup>                          | 0.593                                                                                          |
| F(000)                                      | 5952.0                                                                                         |
| Crystal size/mm <sup>3</sup>                | 0.48 × 0.39 × 0.33                                                                             |
| Radiation                                   | CuKα (λ = 1.54184 Å)                                                                           |
| 2θ range for data collection/°              | 6.974 to 152.256                                                                               |
| Index ranges                                | -25 ≤ h ≤ 24, -25 ≤ k ≤ 14, -61 ≤ l ≤ 69                                                       |
| Reflections collected                       | 47049                                                                                          |
| Independent reflections                     | 11321 [R <sub>int</sub> = 0.0605, R <sub>sigma</sub> = 0.0535]                                 |
| Data/restraints/parameters                  | 11321/0/488                                                                                    |
| Goodness-of-fit on F <sup>2</sup>           | 1.180                                                                                          |
| Final R indexes [I ≥ 2σ (I)]                | R <sub>1</sub> = 0.1311, wR <sub>2</sub> = 0.3318                                              |
| Final R indexes [all data]                  | R <sub>1</sub> = 0.1782, wR <sub>2</sub> = 0.3889                                              |
| Largest diff. peak/hole / e Å <sup>-3</sup> | 1.47/-0.30                                                                                     |
| CCDC number                                 | 1921510                                                                                        |

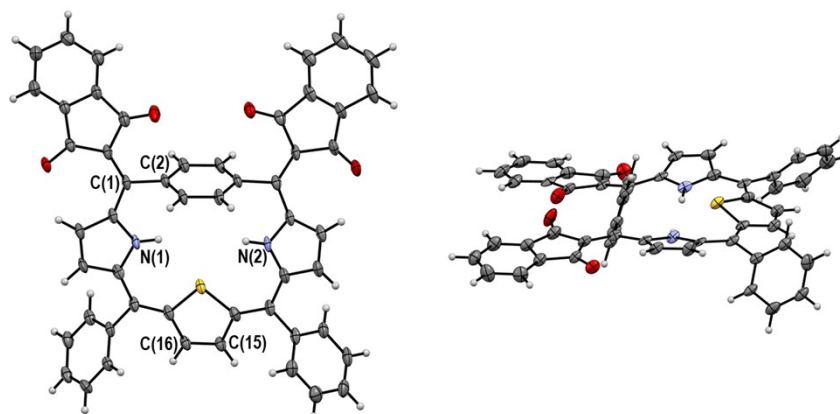

**Figure S34.** The single crystal X-ray structure of compound **7**. Top and side views. The indanedionyl groups are almost in the same plane as the cross-conjugated part of the macrocycle. Thermal ellipsoids are scaled to the 50% probability level.

References:

1. Siddiqui, Z. N.; Khan, T. *Tetrahedron Lett.* **2013**, *54*, 3759-3764.
2. Xiao, P.; Dumur, F.; Graff, B.; Morlet-Savary, F.; Vidal, L. Gimes, D.; Fouassier, J. P.; Lalevee, J. *Macromolecules* **2014**, *47*, 23-34.
